# Supplementary material for: NHC-catalyzed [4 + 2] annulation of 2-bromo-2-enals with acylhydrazones: enantioselective synthesis of δ-lactams
Source: Royal Society of Chemistry journal article supplement (doi:10.1039/c6ob02253g), 2016-12-24
Supplement: c6ob02253g1.pdf [file c6ob02253g1.pdf]

## Supporting Information

### NHC-Catalyzed [4+2] Annulation of 2-Bromo-2-Enal with Acylhydrazones: Enantioselective Synthesis of $\delta$ -Lactams

Baomin Sun,<sup>‡a</sup> Lijiu Gao,<sup>‡a</sup> Shide Shen,<sup>b</sup> Chenxia Yu,<sup>a</sup> Tuanjie Li,<sup>a</sup> Yuanwei Xie<sup>a</sup> and  
Changsheng Yao<sup>\*a</sup>

|                                                                   |    |
|-------------------------------------------------------------------|----|
| 1. General methods .....                                          | 2  |
| 2. Abstract .....                                                 | 2  |
| 3. Experimental section.....                                      | 3  |
| 4. NMR Spectra .....                                              | 3  |
| 5. HPLC Spectra .....                                             | 18 |
| 6. Determination of the absolute configuration by comparison..... | 32 |

## 1. General methods

Common reagents and materials were purchased from commercial sources and purified by recrystallization or distillation. Melting points were determined in open capillaries and were uncorrected. IR spectra were taken on a FT-IR-Tensor 27 spectrometer in KBr pellets and reported in  $\text{cm}^{-1}$ .  $^1\text{H}$  NMR spectra were measured on a Bruker DPX 400 MHz spectrometer in  $\text{DMSO-}d_6$  (100 MHz,  $^{13}\text{C}$  NMR) or  $\text{CDCl}_3$  with chemical shift ( $\delta$ ) given in ppm relative to TMS as internal standard. High-resolution mass spectra (HRMS) were obtained on a micrOTOF-Q II HRMS/MS instrument (Bruker) with the technique of electrospray ionization. Optical rotation values were measured with instruments operating at  $\lambda = 589 \text{ nm}$ , corresponding to the sodium D line at the temperatures indicated.

## 2. Abstract

An asymmetric assembly of  $\delta$ -lactam was realized via the NHC-catalyzed formal [4+2] annulation of acylhydrazones and 2-bromo-2-enals bearing  $\gamma$ -H. The advantages of this protocol include high enantioselectivity, good yields, mild reaction condition and potential biological significance of the final products.

### 3. Experimental section

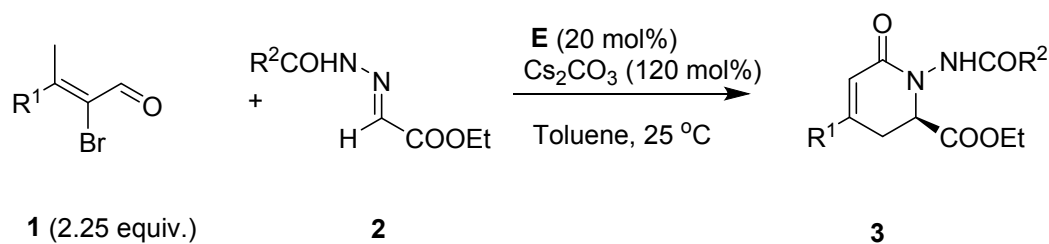

An oven-dried 10-mL Schlenk tube equipped with a magnetic stir bar was charged with triazolium salt **E** (16.7 mg, 0.04 mmol),  $\text{Cs}_2\text{CO}_3$  (78.2 mg, 0.24 mmol),  $\alpha$ -bromo- $\alpha,\beta$ -unsaturated aldehyde **1** (0.45 mmol) and hydrazone **2** (0.2 mmol). The tube was closed with a septum. And the freshly distilled toluene (3 mL) was added into the mixture with a syringe. Then the mixture was stirred at 25 °C until completion (monitored by TLC). After removal of the solvent under reduced pressure, the resulting crude product was purified by column chromatography (silicagel, mixtures of petroleum ether/ethyl acetate, 2:1, v/v) to afford the desired product **3**.

### 4. NMR Spectra

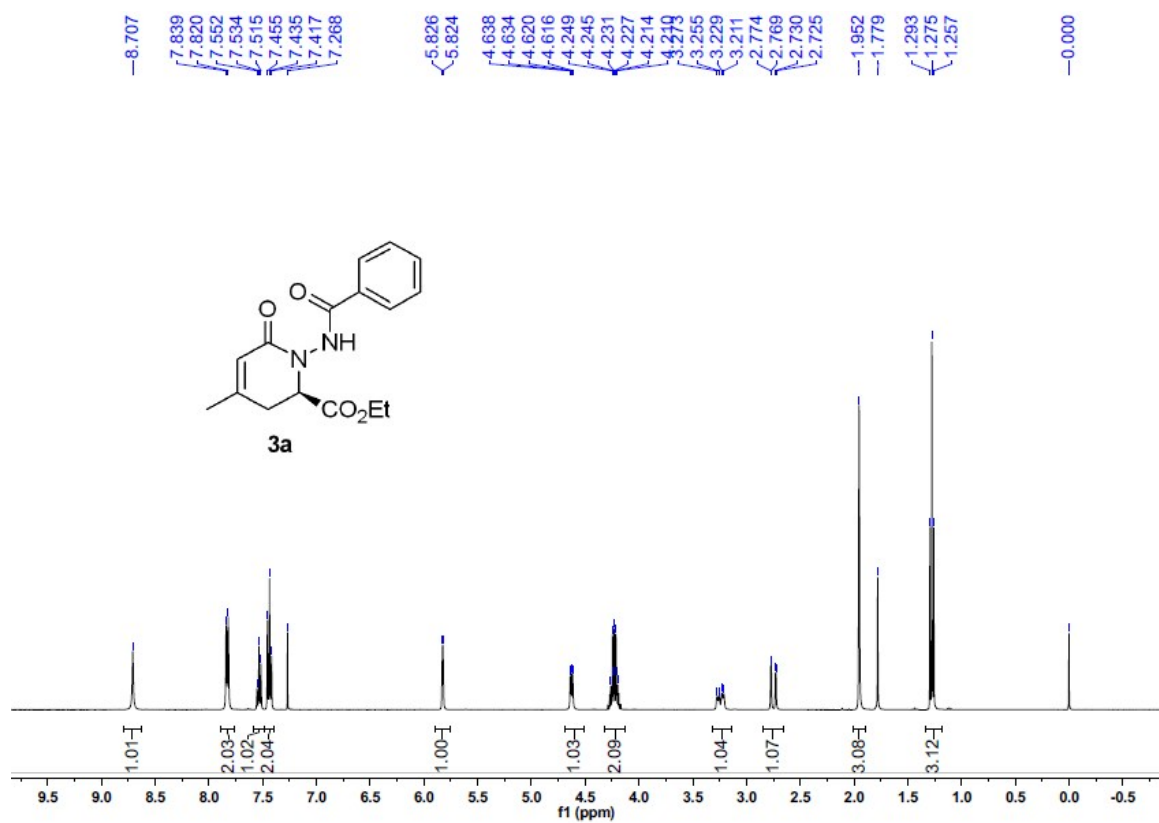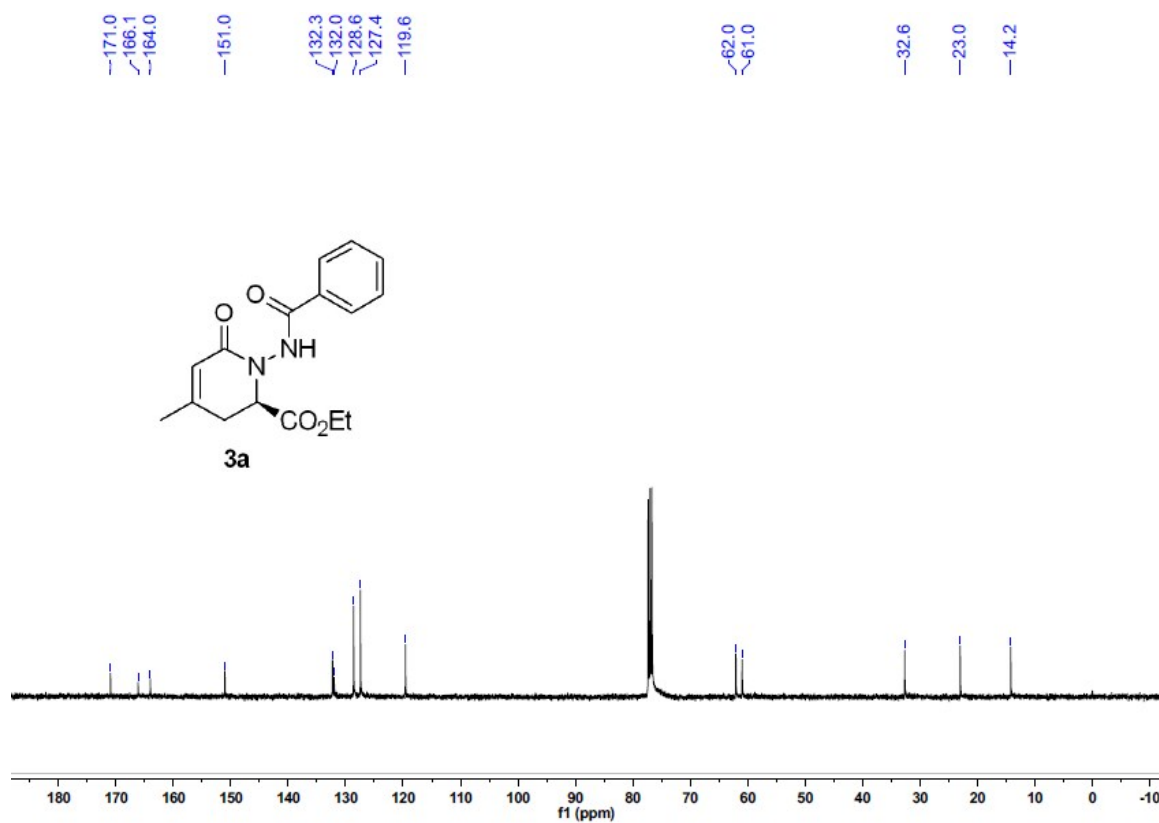

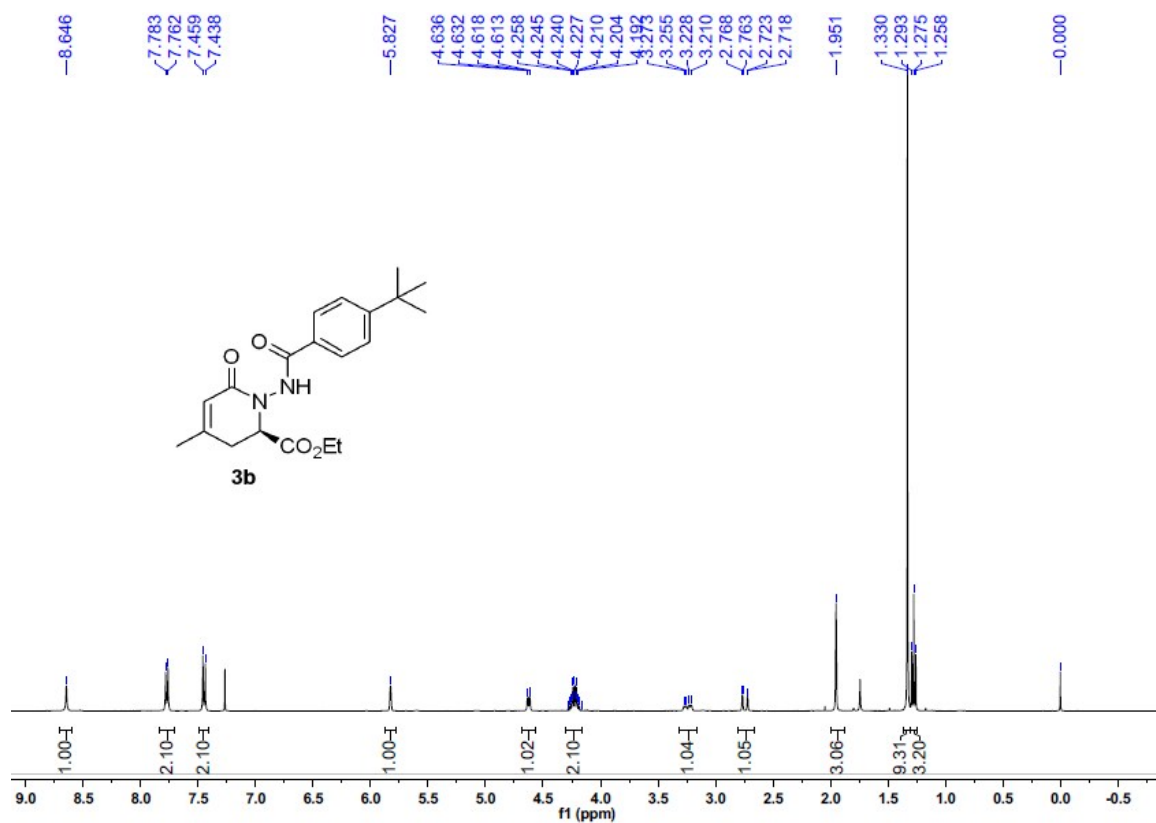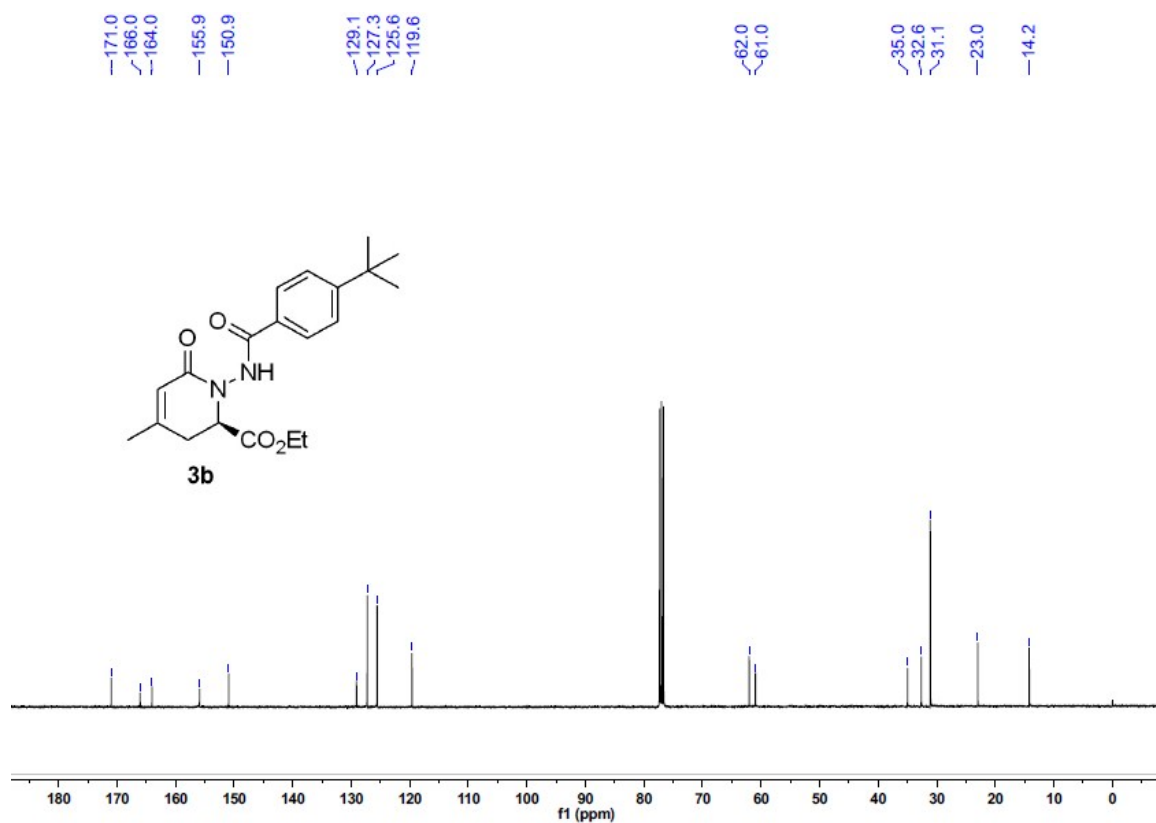

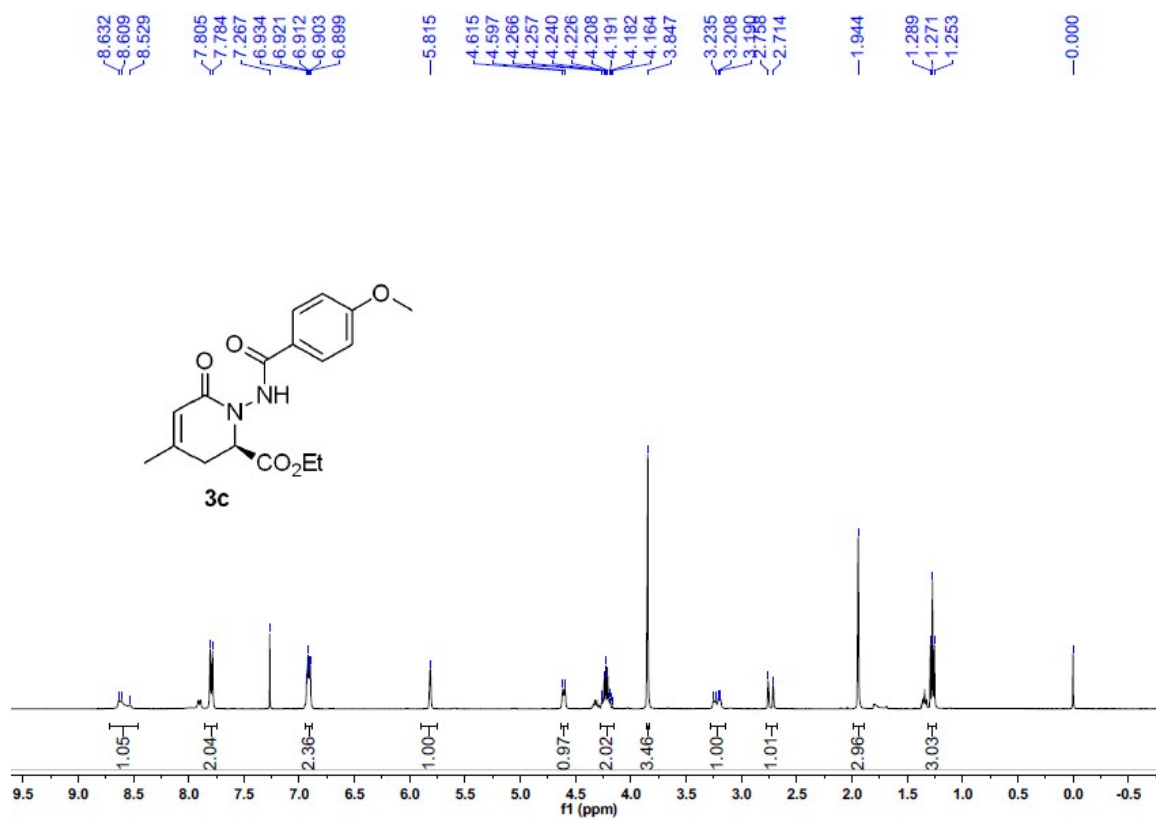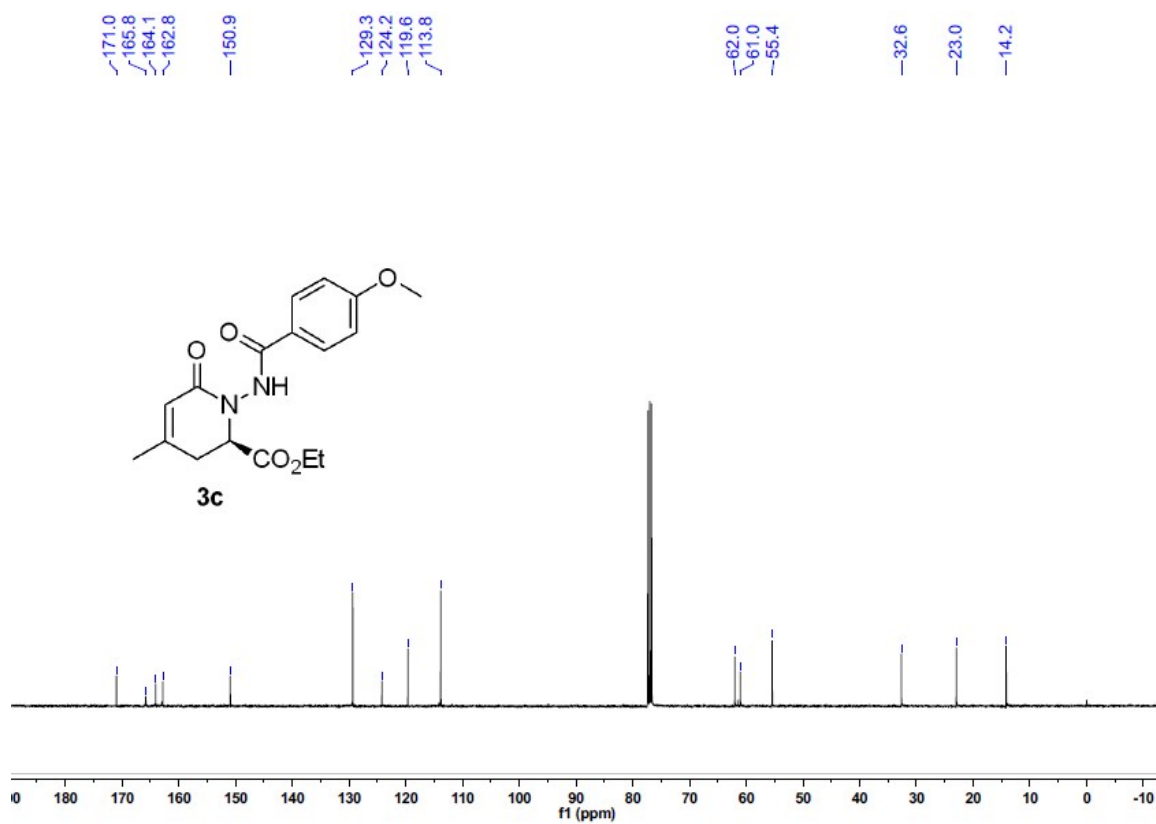

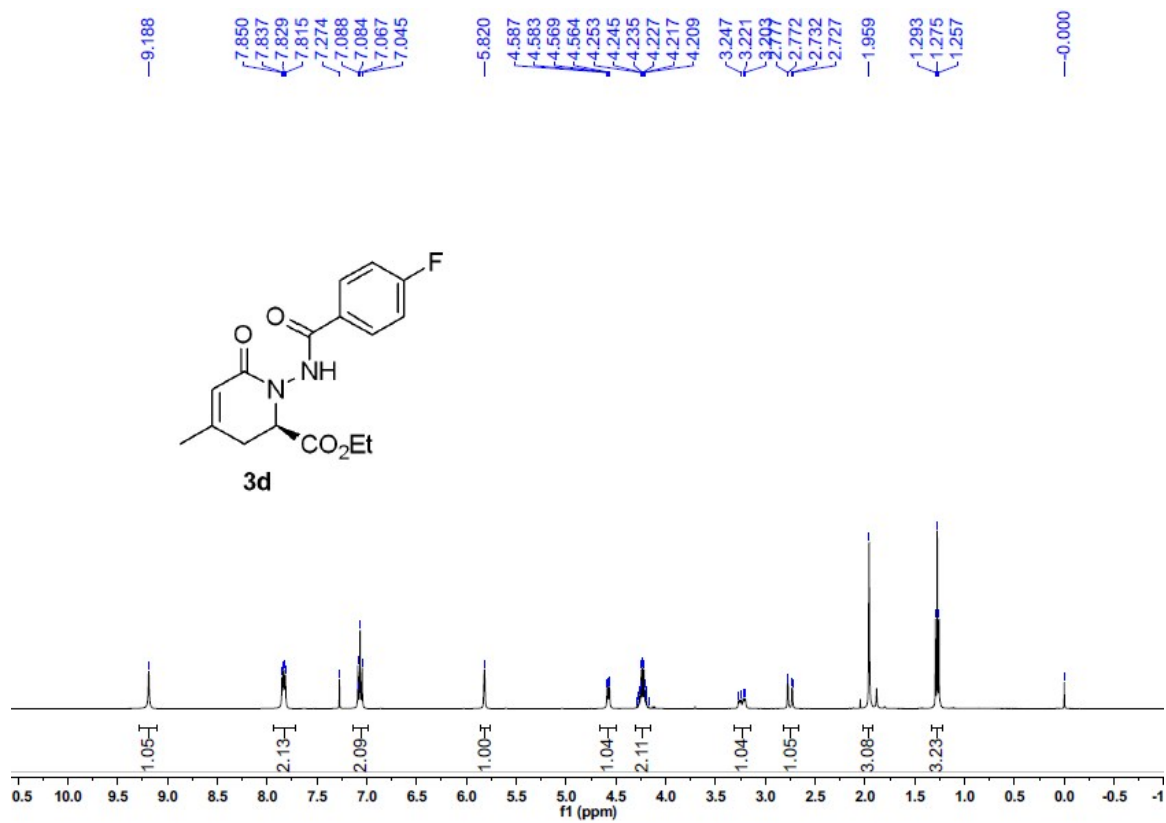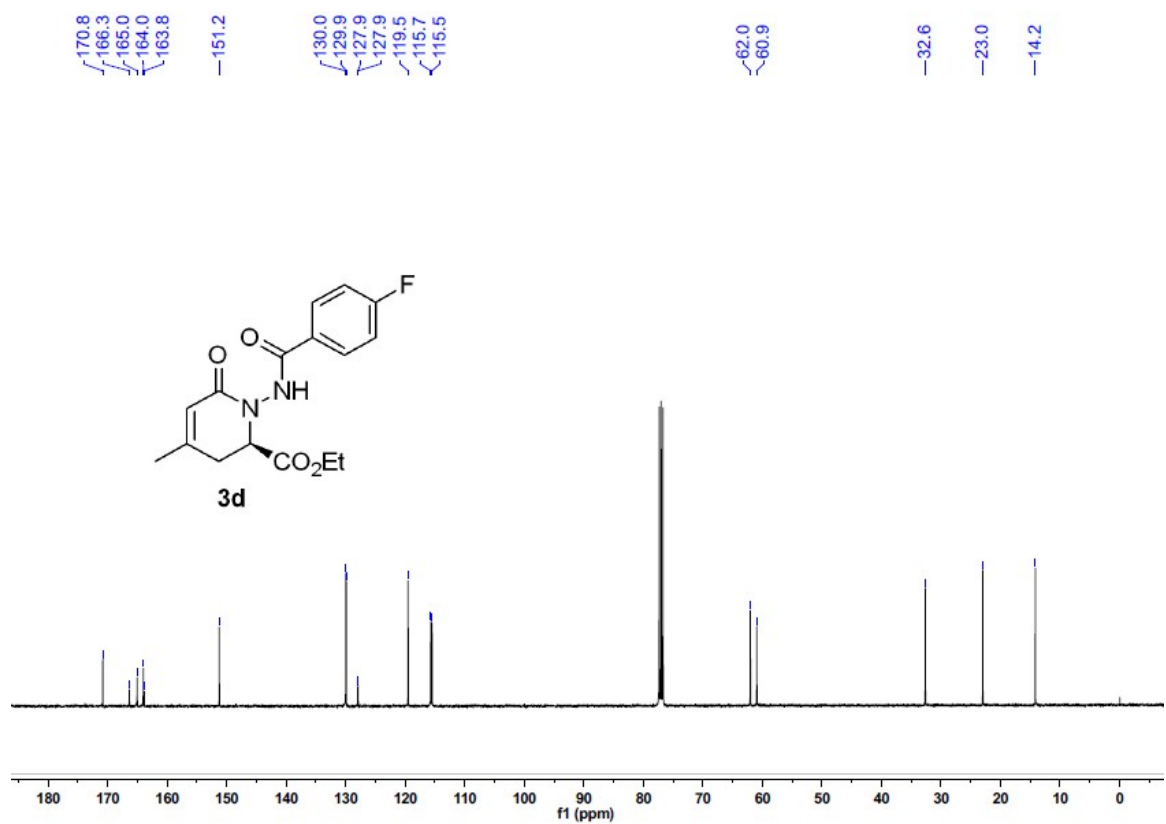

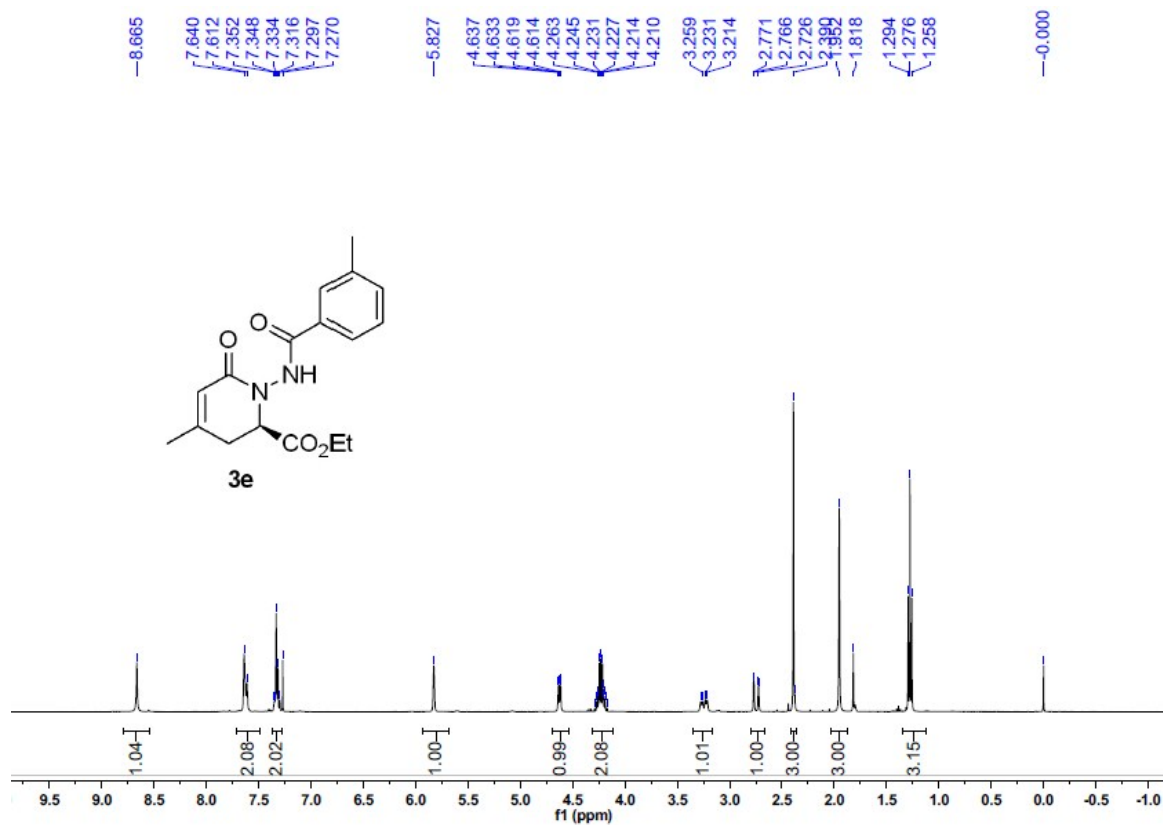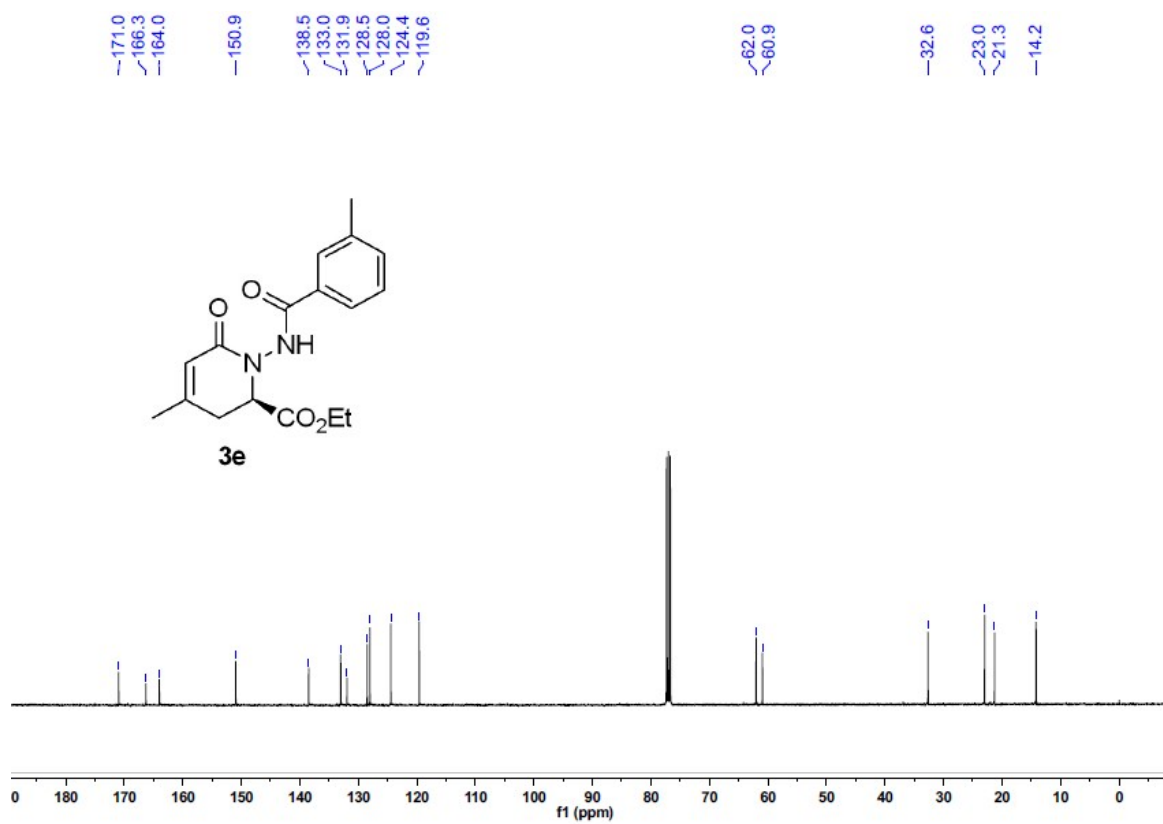



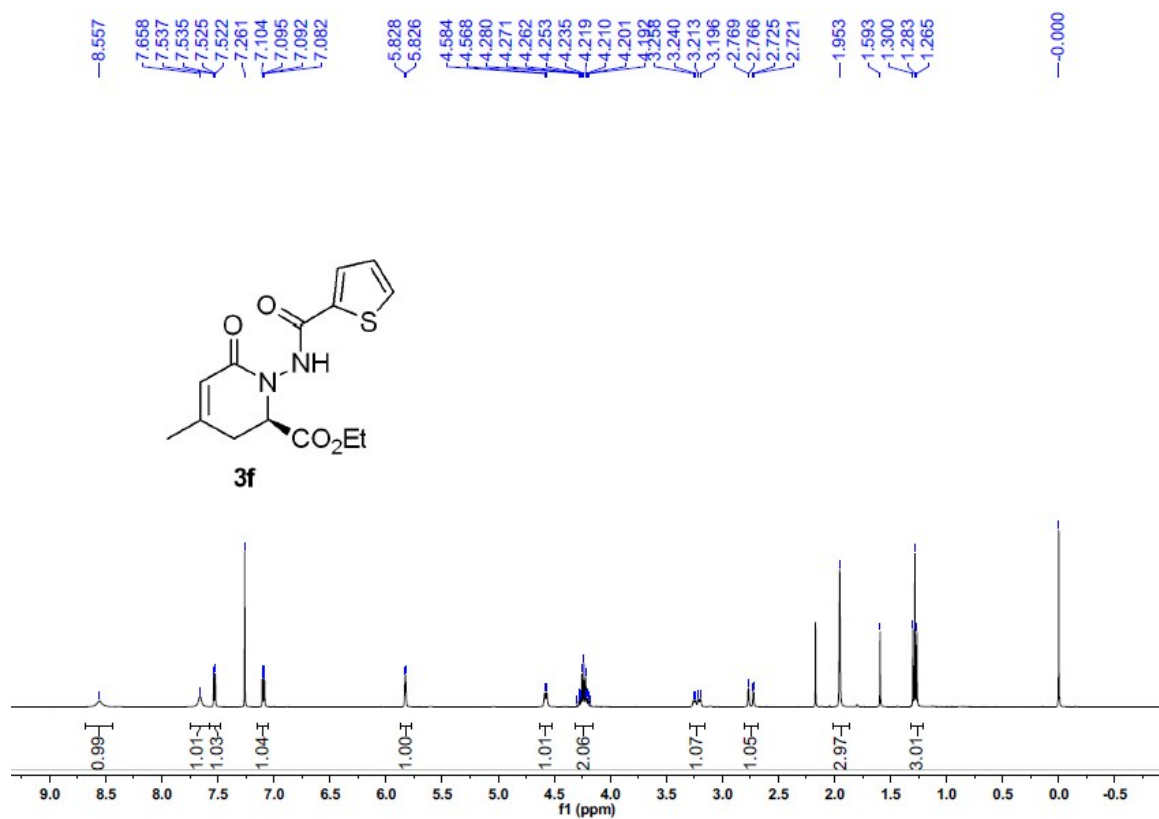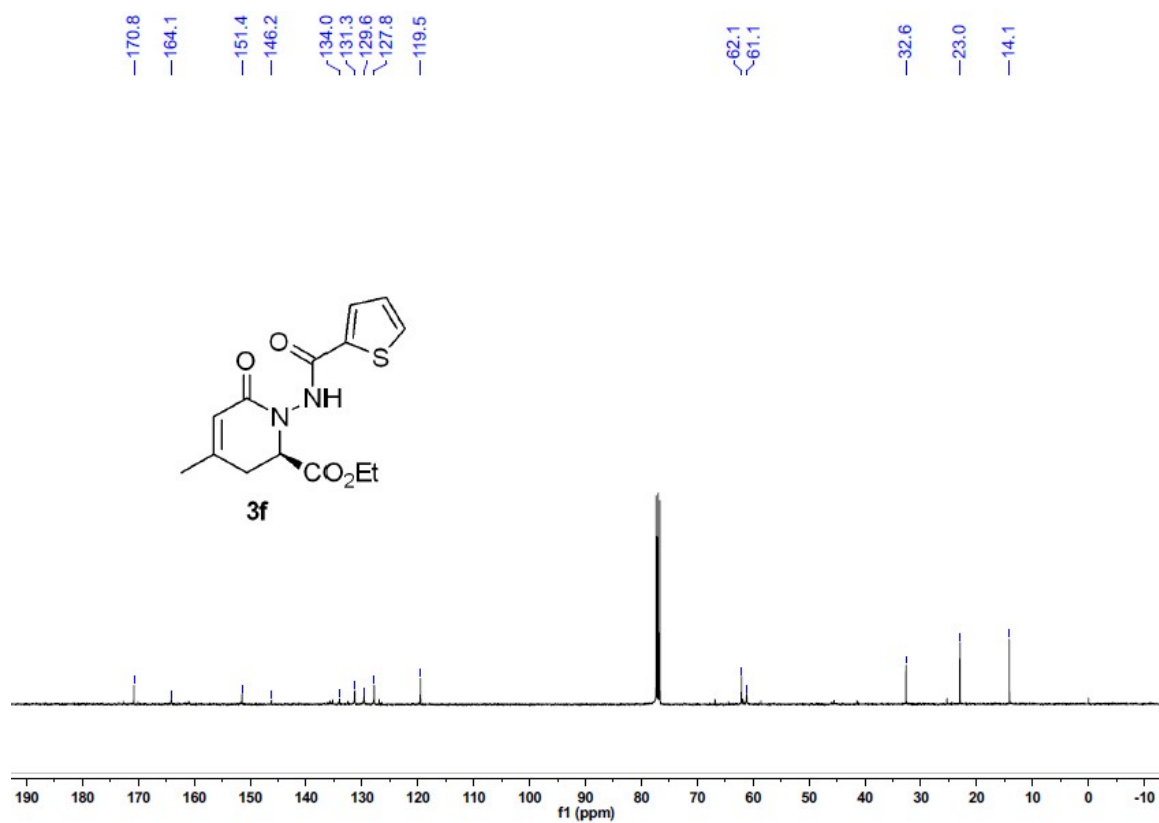

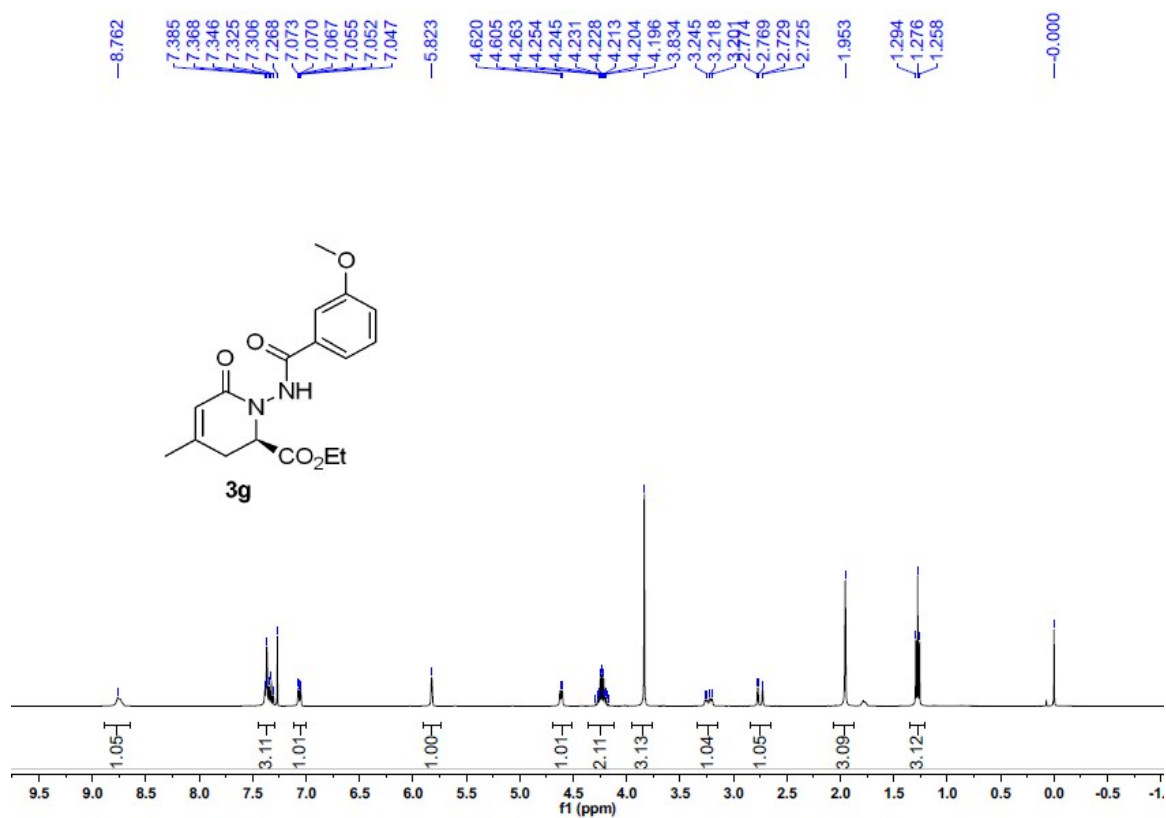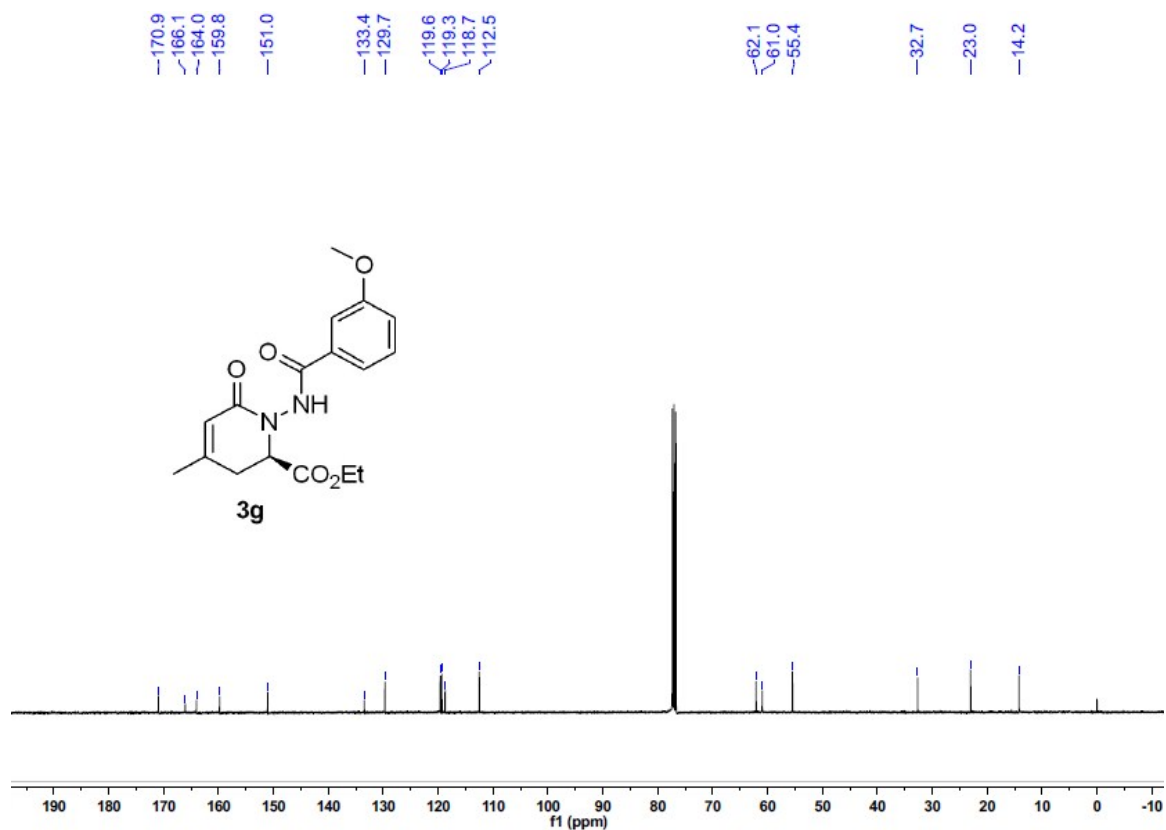

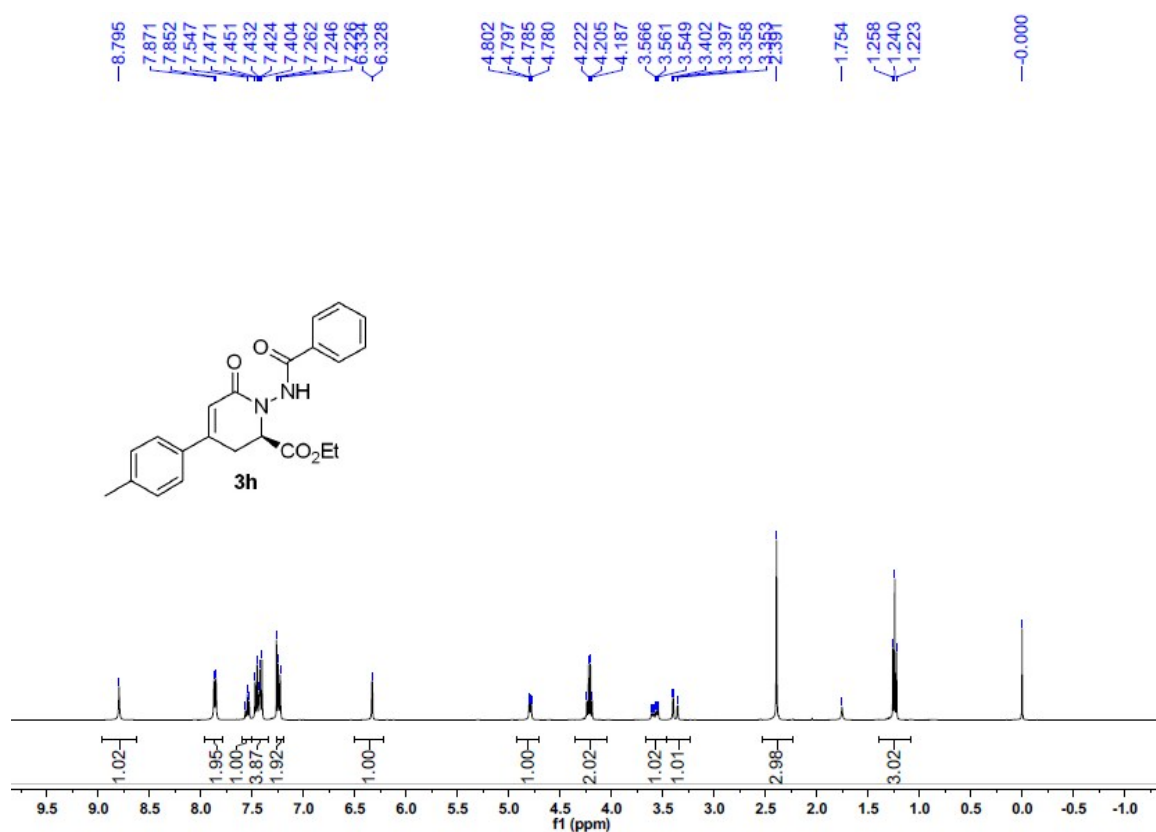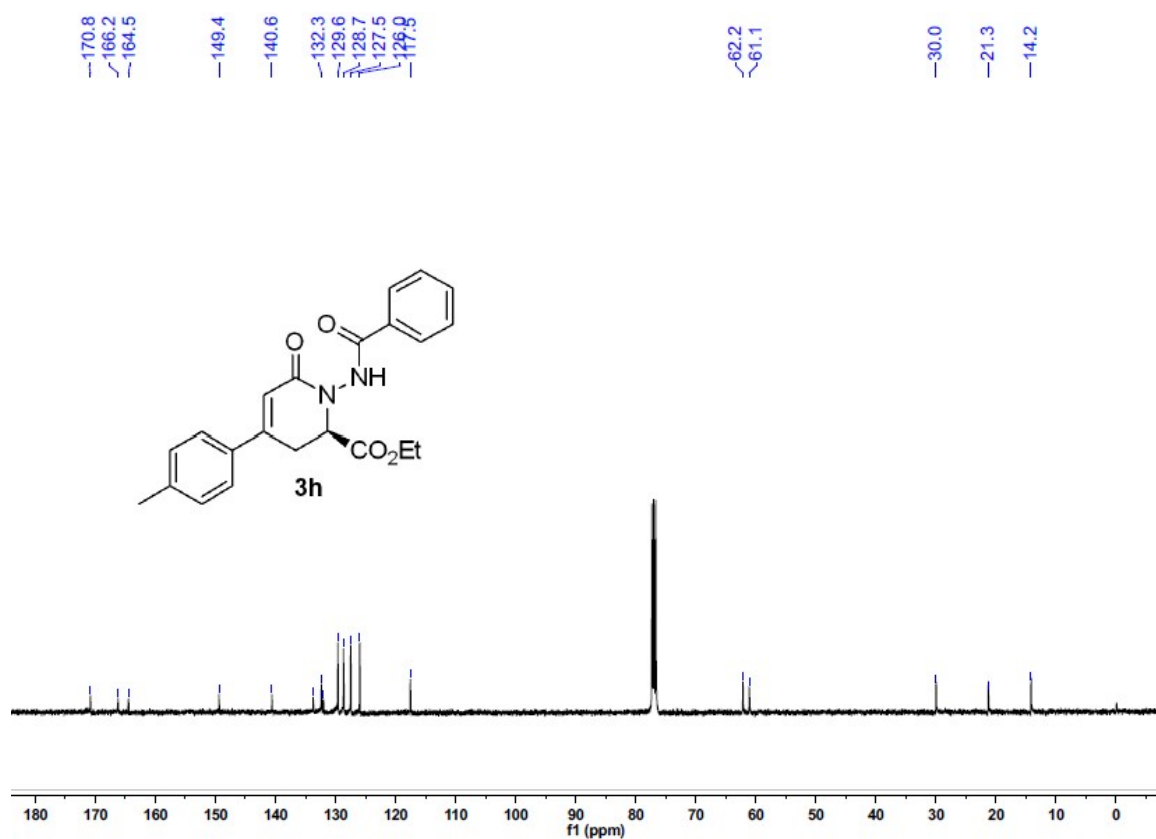

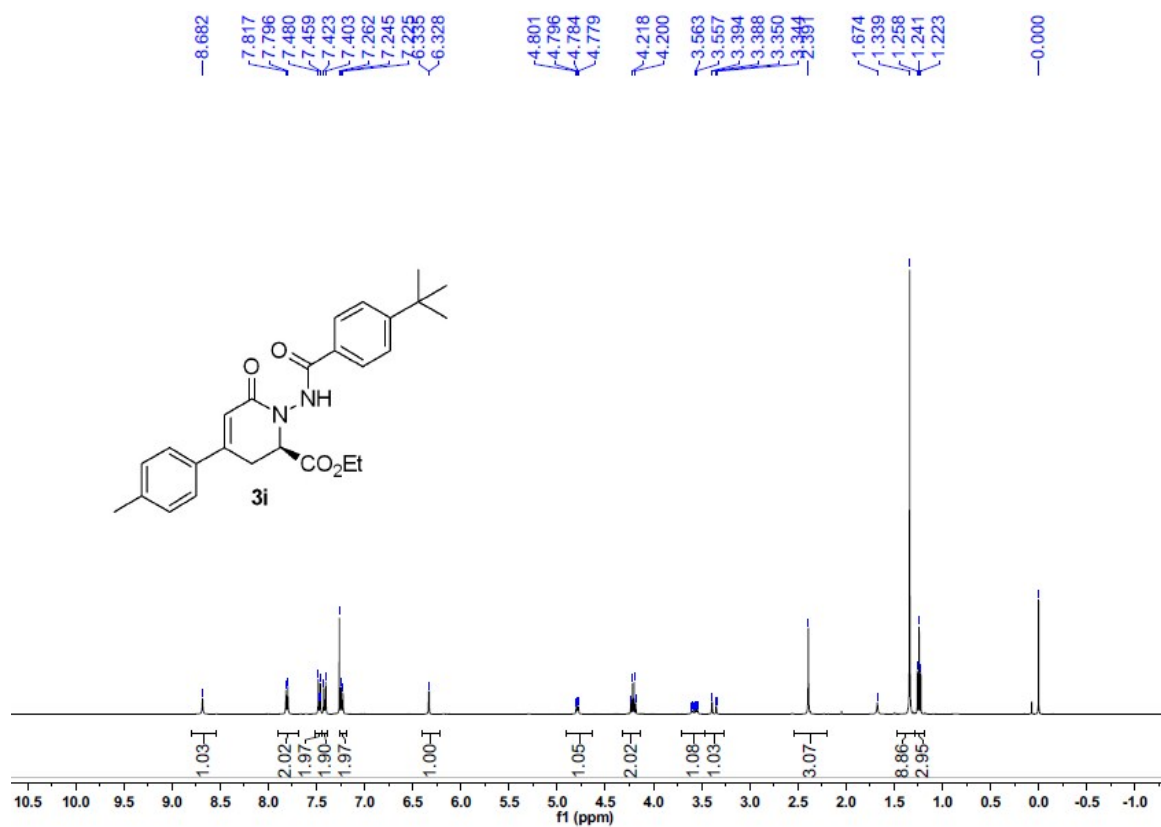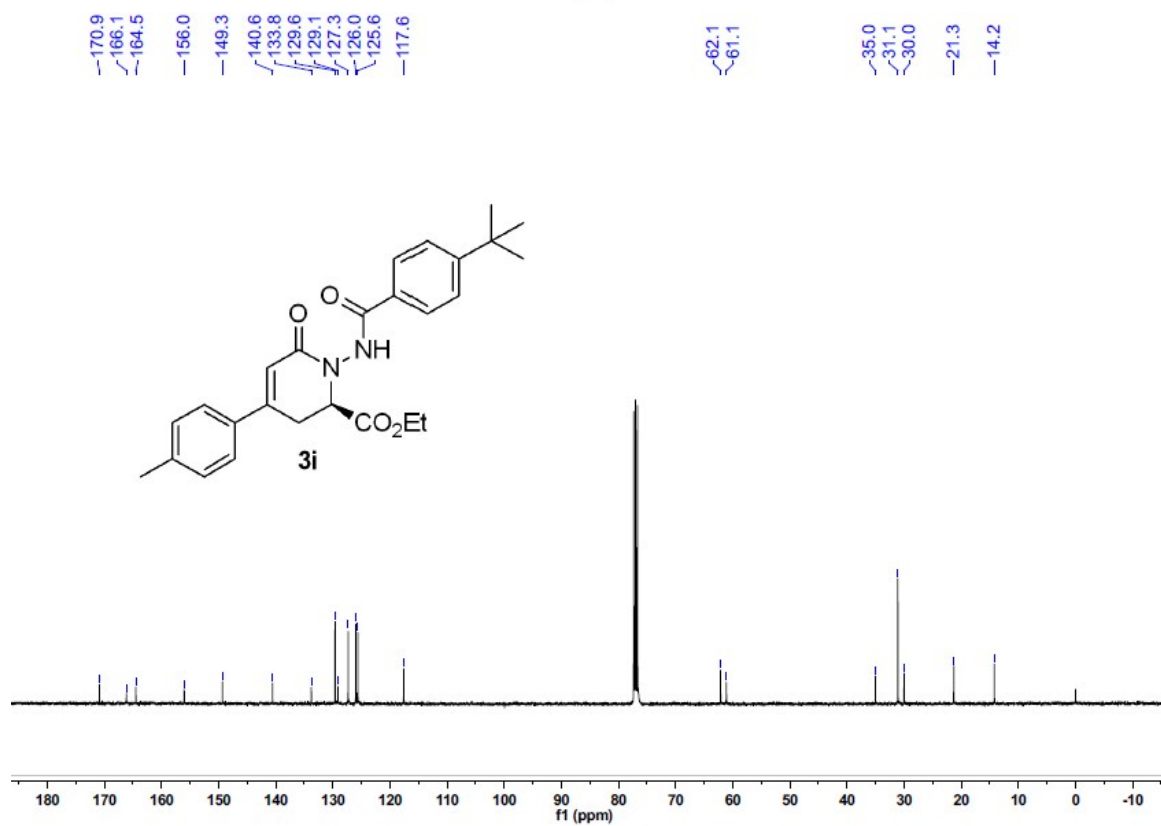

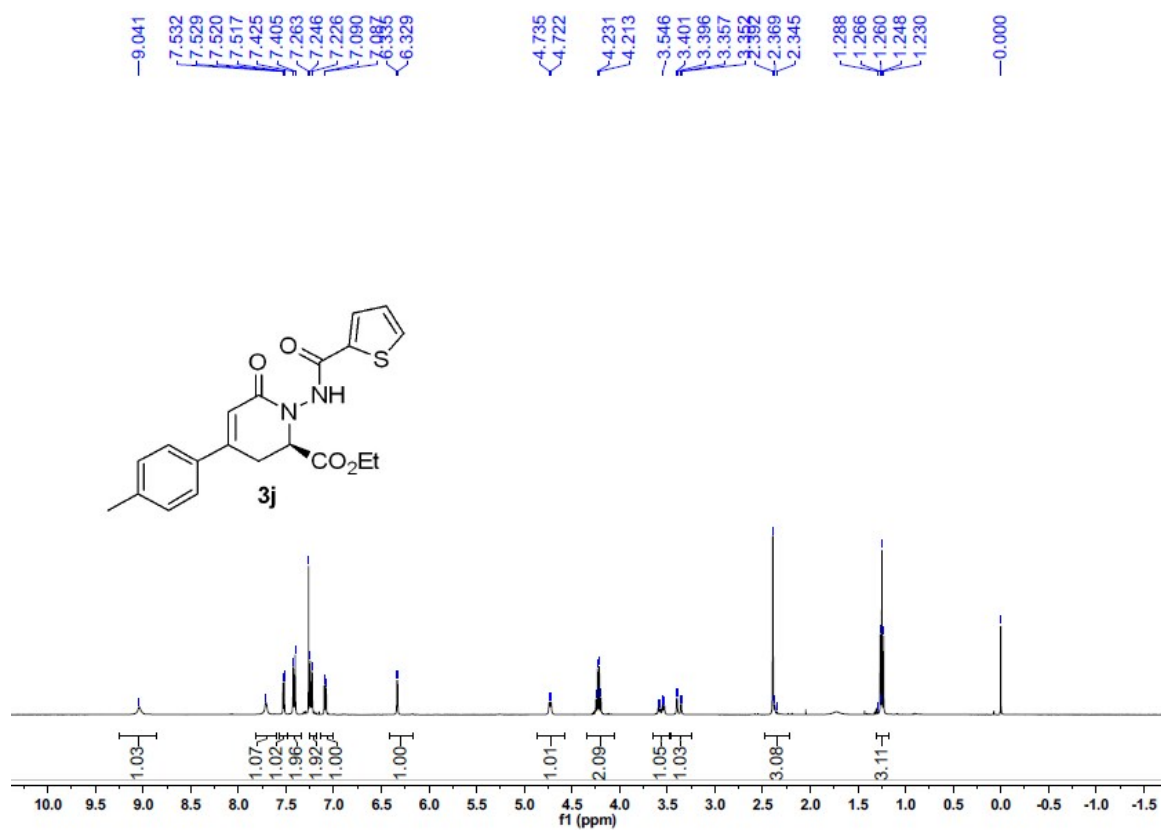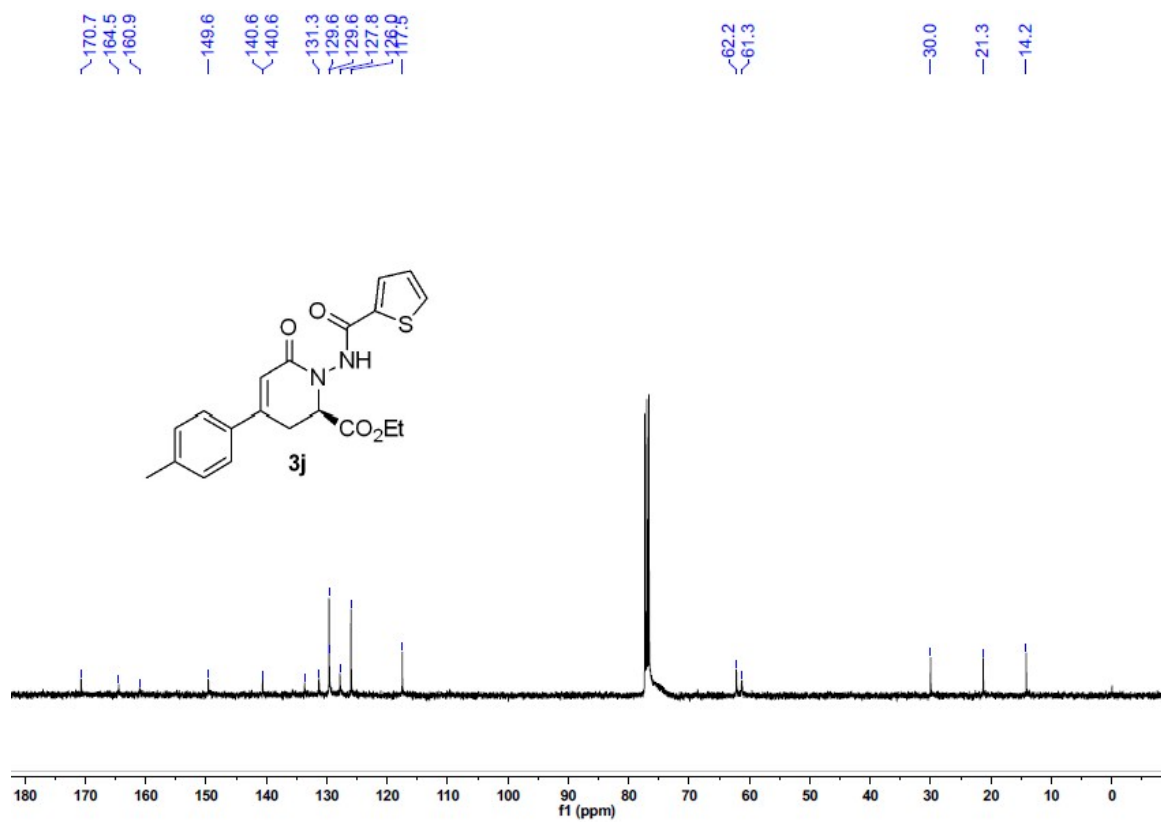

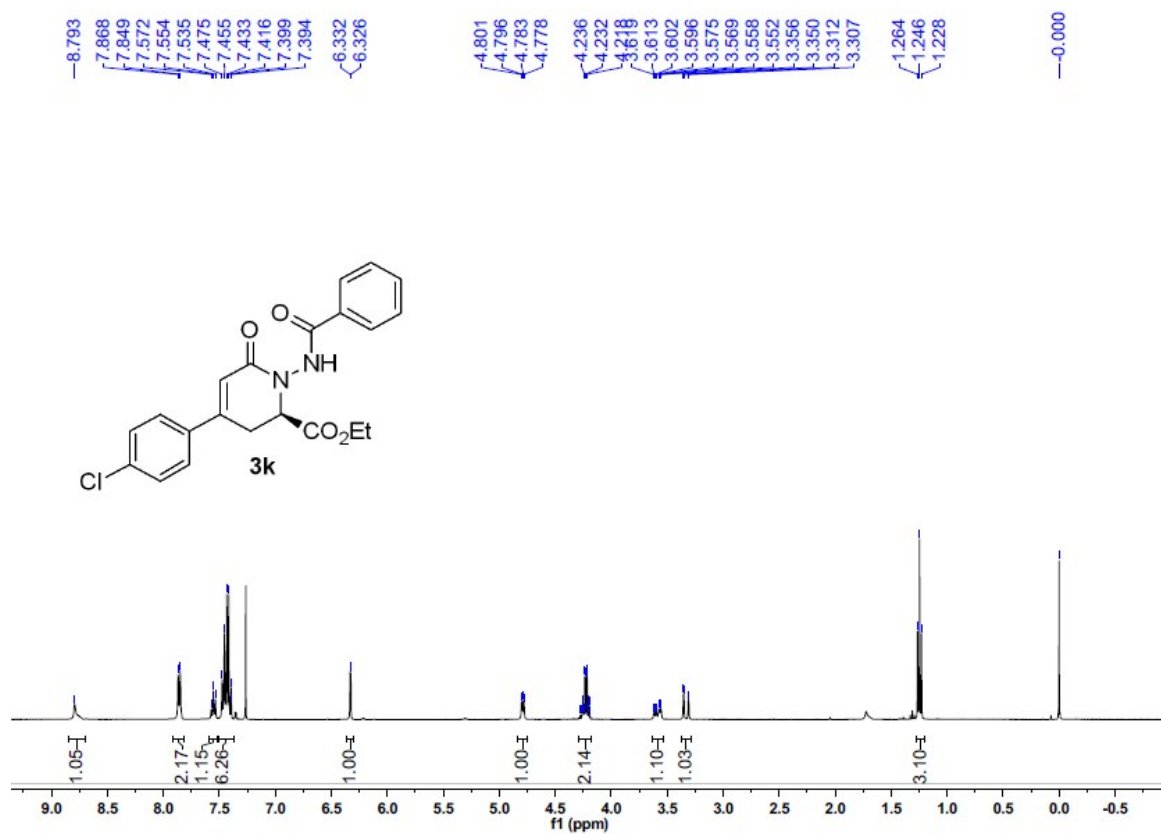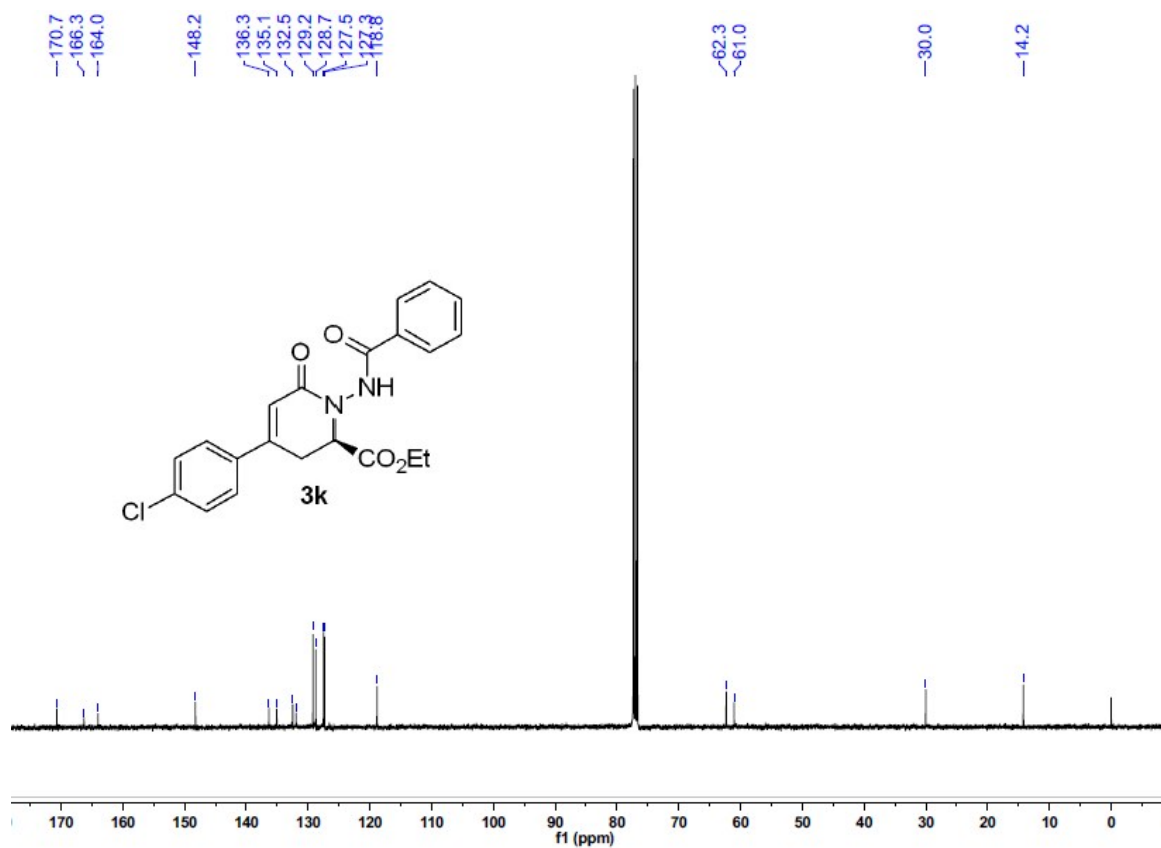

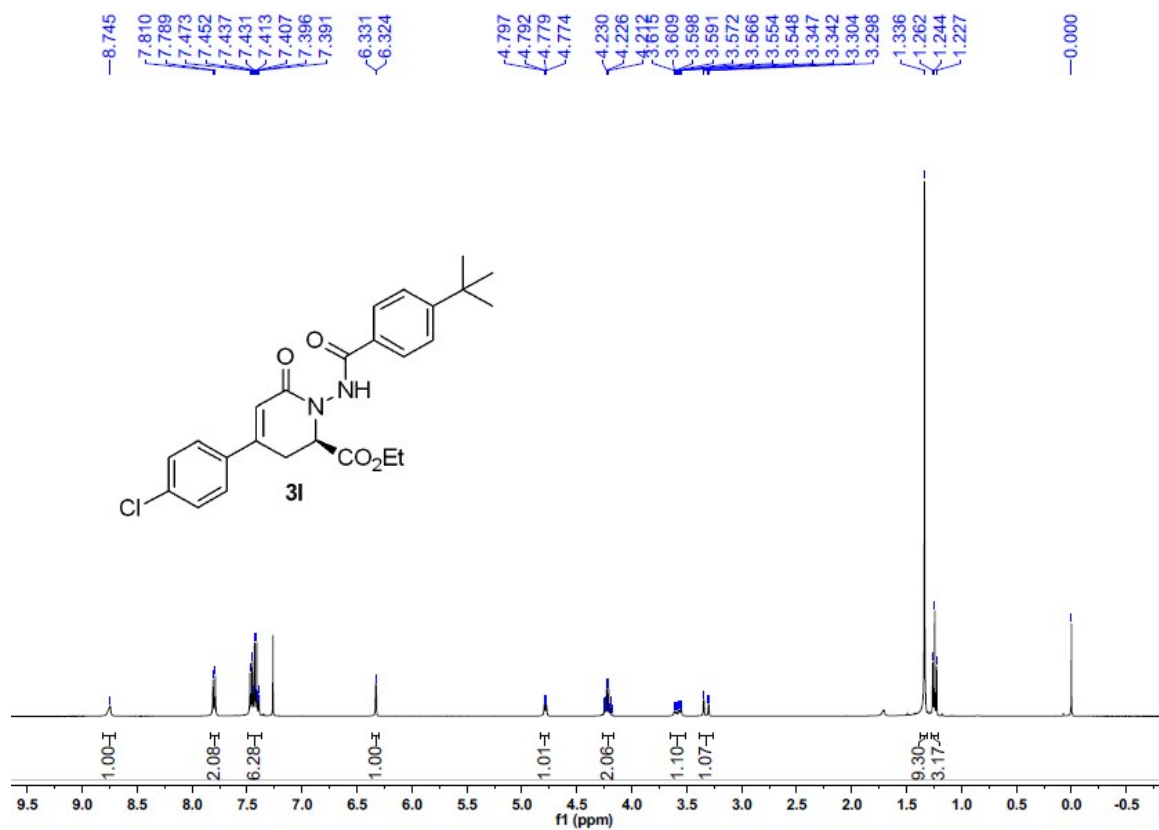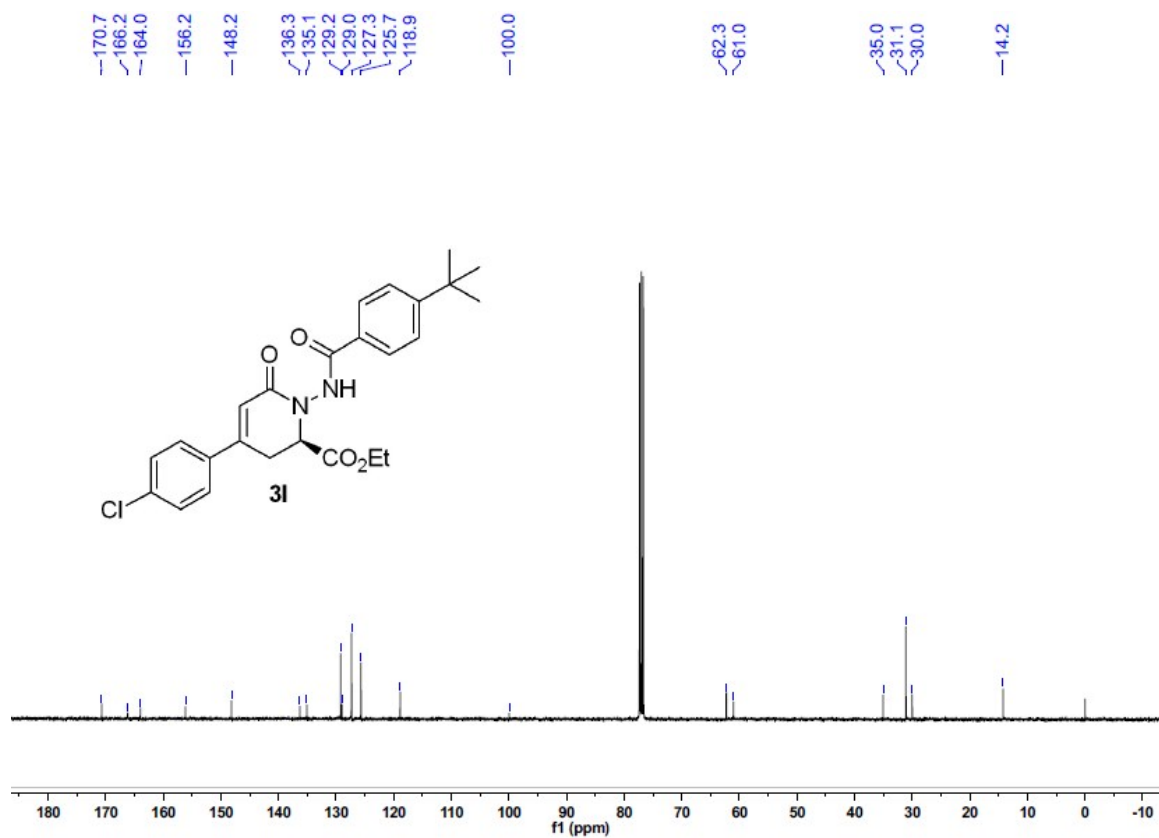

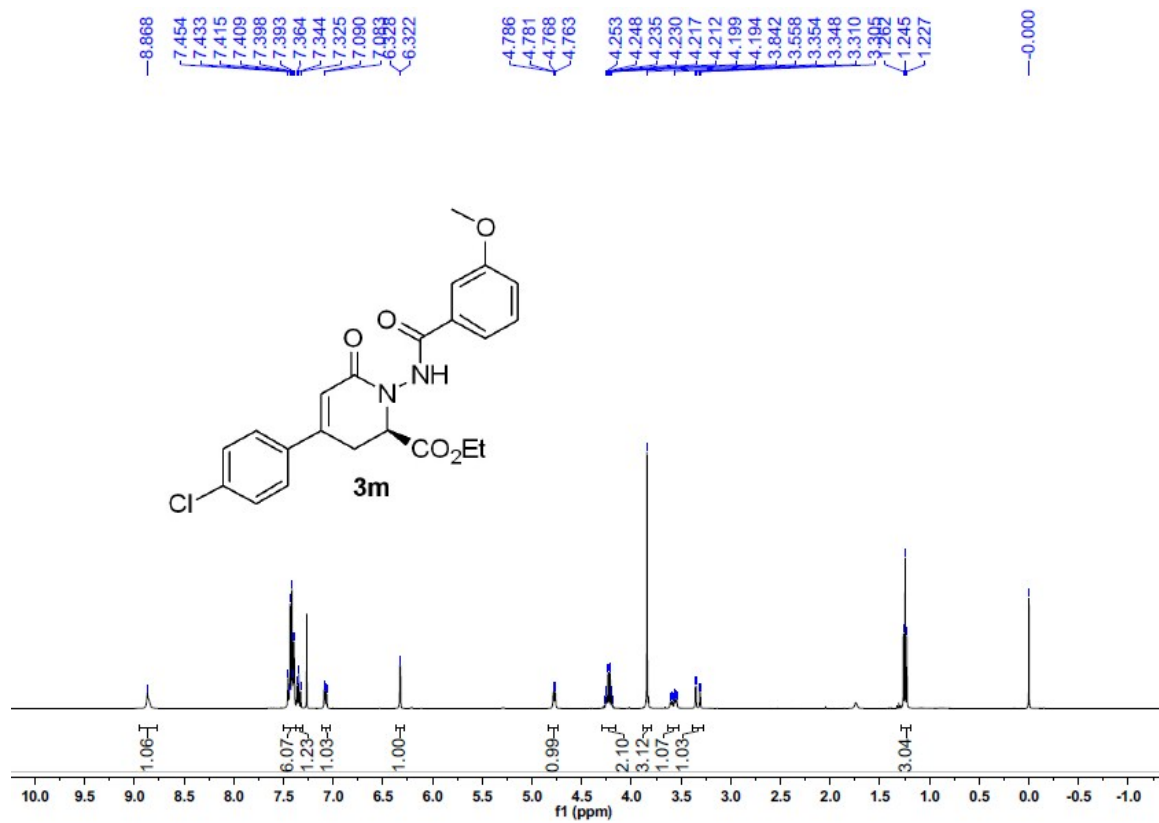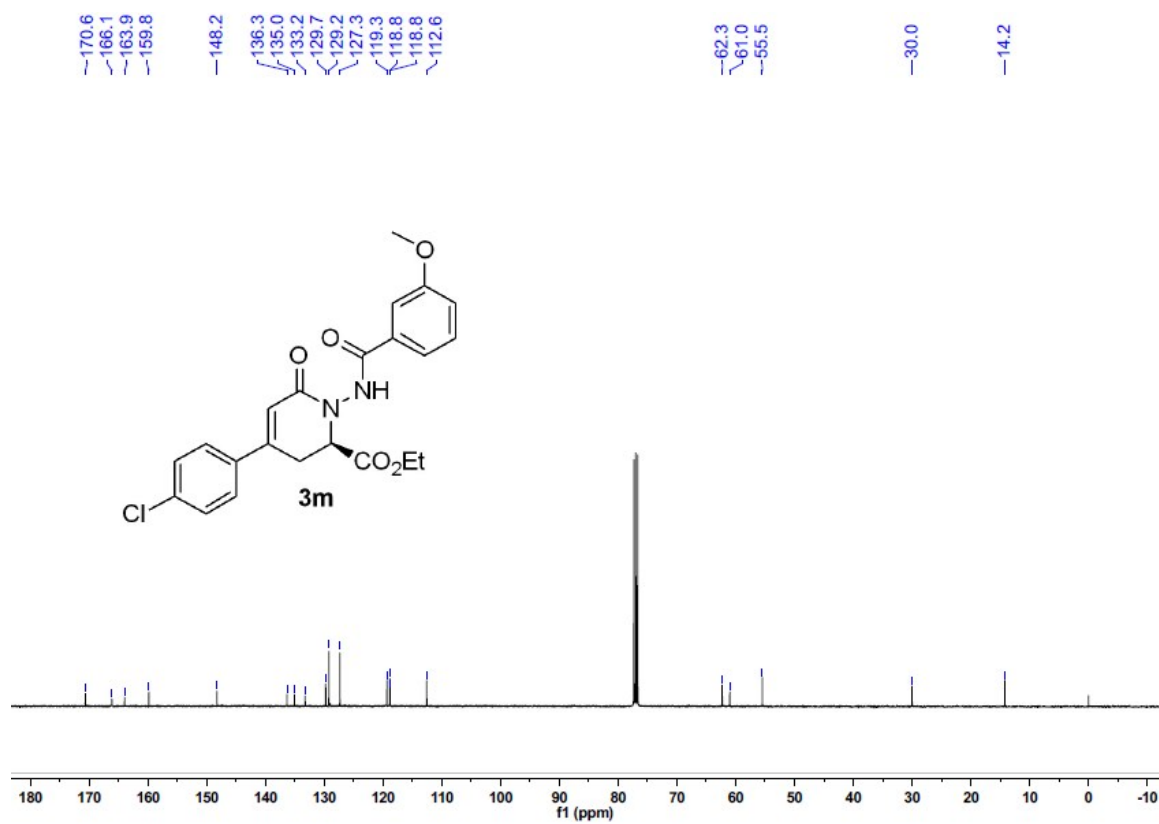



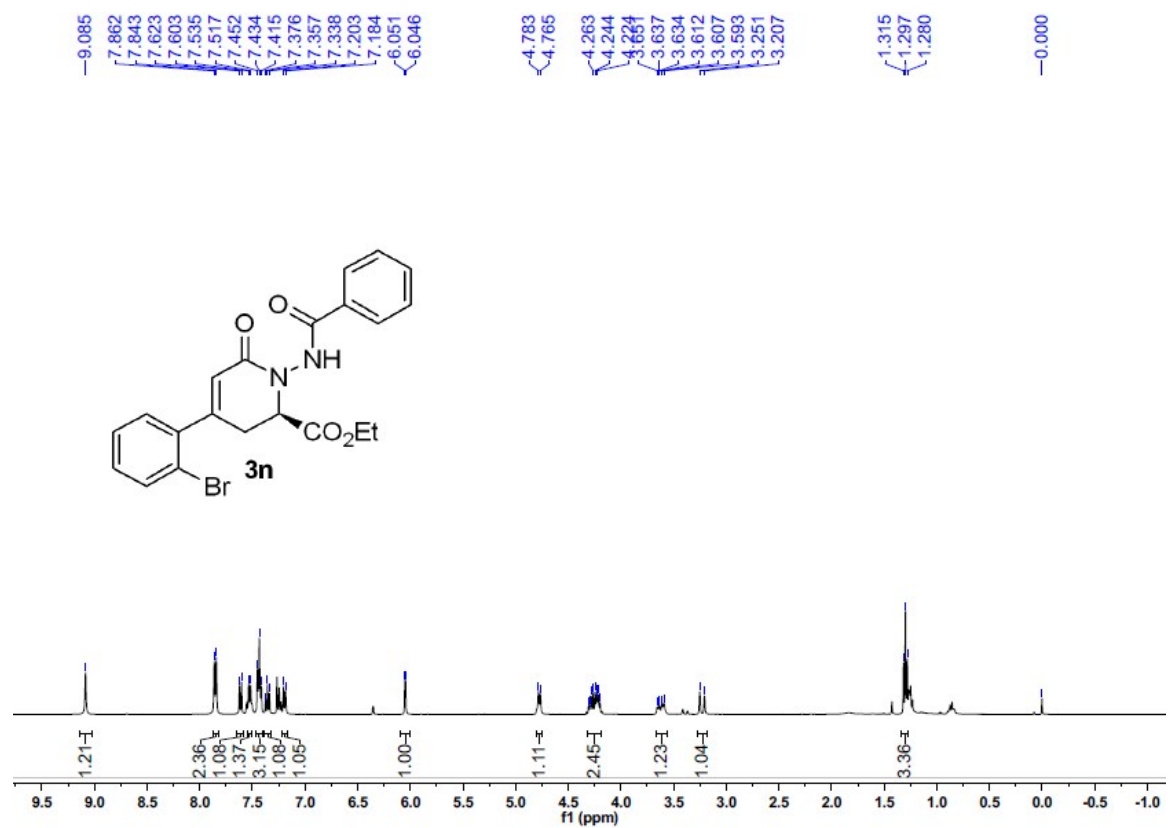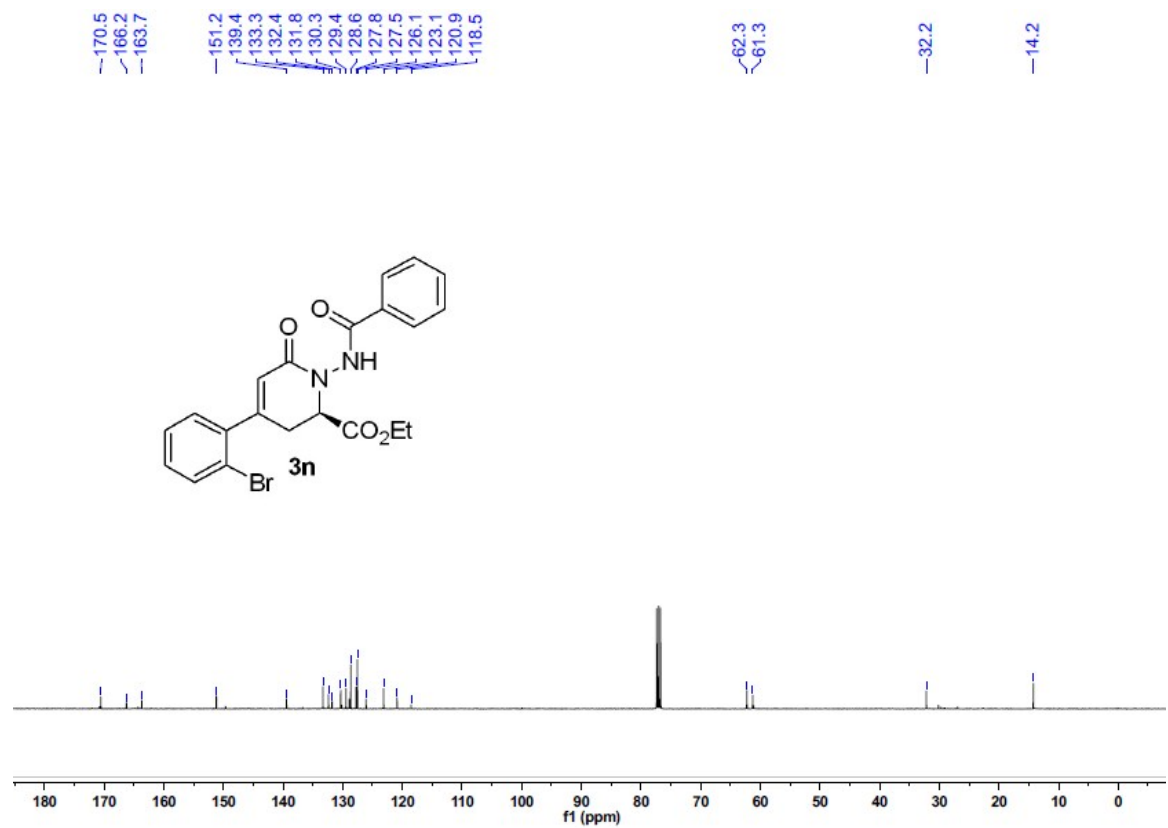

## 5. HPLC Spectra

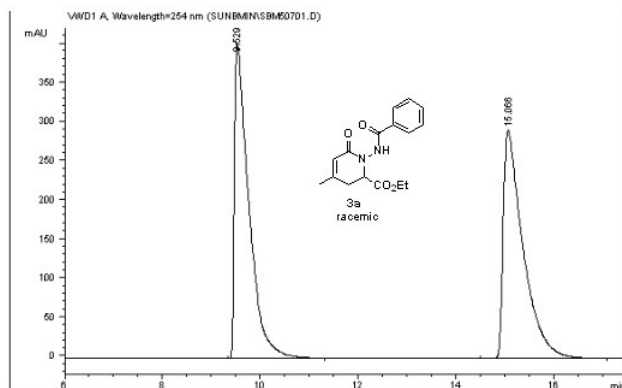

=====  
Area Percent Report  
=====

Sorted By : Signal  
Multiplier : 1.0000  
Dilution : 1.0000  
Use Multiplier & Dilution Factor with ISTDs

Signal 1: VWD1 A, Wavelength=254 nm

| Peak #   | RetTime [min] | Type | Width [min] | Area [mAU*s] | Height [mAU] | Area %  |
|----------|---------------|------|-------------|--------------|--------------|---------|
| 1        | 9.529         | PB   | 0.2915      | 8253.67090   | 402.76825    | 49.9614 |
| 2        | 15.066        | EB   | 0.4065      | 8266.42969   | 291.56198    | 50.0386 |
| Totals : |               |      |             | 1.65201e4    | 694.33023    |         |

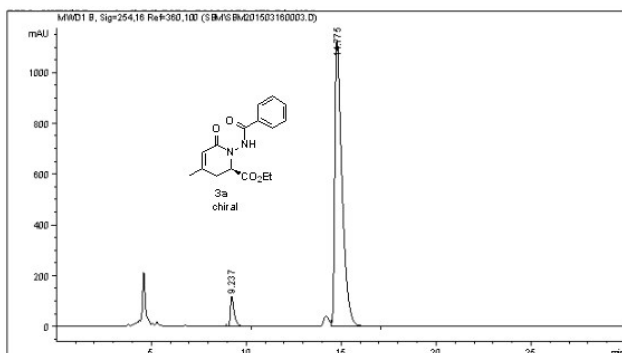

=====  
Area Percent Report  
=====

Sorted By : Signal  
Multiplier : 1.0000  
Dilution : 1.0000  
Use Multiplier & Dilution Factor with ISTDs

Signal 1: MWD1 B, Sig=254,16 Ref=360,100

| Peak #   | RetTime [min] | Type | Width [min] | Area [mAU*s] | Height [mAU] | Area %  |
|----------|---------------|------|-------------|--------------|--------------|---------|
| 1        | 9.237         | EB   | 0.2046      | 1629.25891   | 116.88483    | 5.2045  |
| 2        | 14.775        | VB   | 0.3863      | 2.96758e4    | 1122.96851   | 94.7955 |
| Totals : |               |      |             | 3.13050e4    | 1239.85334   |         |

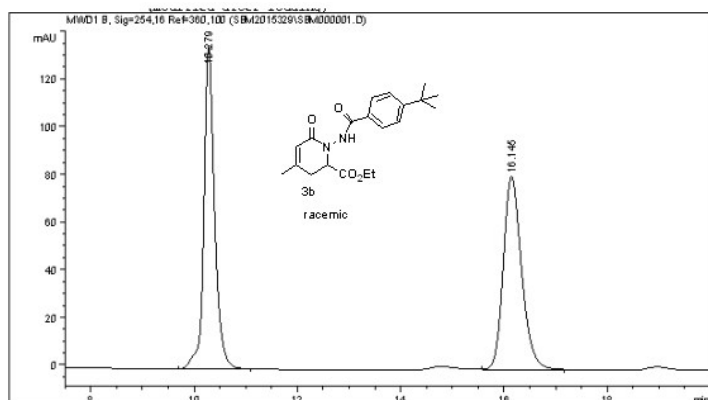

# Area Percent Report

Sorted By : Signal  
Multiplier : 1.0000  
Dilution : 1.0000  
Use Multiplier & Dilution Factor with ISTDs

Signal 1: MWD1 B, Sig=254,16 Ref=360,100

| Peak # | RetTime (min) | Type | Width (min) | Area (mAU*s) | Height (mAU) | Area %  |
|--------|---------------|------|-------------|--------------|--------------|---------|
| 1      | 10.279        | BB   | 0.2147      | 1956.25232   | 135.26466    | 49.4599 |
| 2      | 16.145        | BB   | 0.3774      | 1998.97559   | 81.14372     | 50.5401 |

Totals : 3955.22791 216.40839

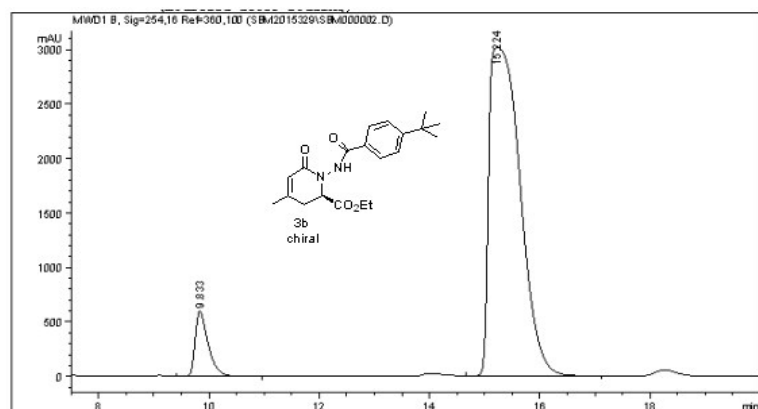

# Area Percent Report

Sorted By : Signal  
Multiplier : 1.0000  
Dilution : 1.0000  
Use Multiplier & Dilution Factor with ISTDs

Signal 1: MWD1 B, Sig=254,16 Ref=360,100

| Peak # | RetTime (min) | Type | Width (min) | Area (mAU*s) | Height (mAU) | Area %  |
|--------|---------------|------|-------------|--------------|--------------|---------|
| 1      | 9.833         | VB   | 0.2437      | 9836.29199   | 598.59888    | 7.6450  |
| 2      | 15.224        | VV   | 0.5148      | 1.18827e5    | 3021.71460   | 92.3550 |

Totals : 1.28664e5 3620.31348

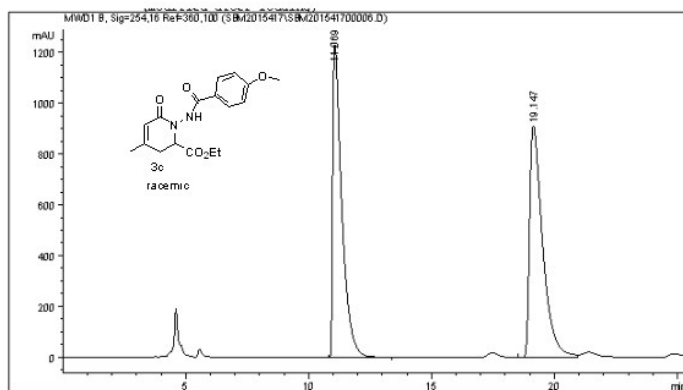

=====  
Area Percent Report  
=====

Sorted By : Signal  
Multiplier : 1.0000  
Dilution : 1.0000  
Use Multiplier & Dilution Factor with ISTDs

Signal 1: MWD1 B, Sig=254,16 Ref=360,100

| Peak # | RetTime [min] | Type | Width [min] | Area [mAU*s] | Height [mAU] | Area %  |
|--------|---------------|------|-------------|--------------|--------------|---------|
| 1      | 11.069        | BB   | 0.3764      | 3.16462e4    | 1229.07520   | 48.5074 |
| 2      | 19.147        | BB   | 0.5503      | 3.35937e4    | 910.74097    | 51.4926 |

Totals : 6.52399e4 2139.81616

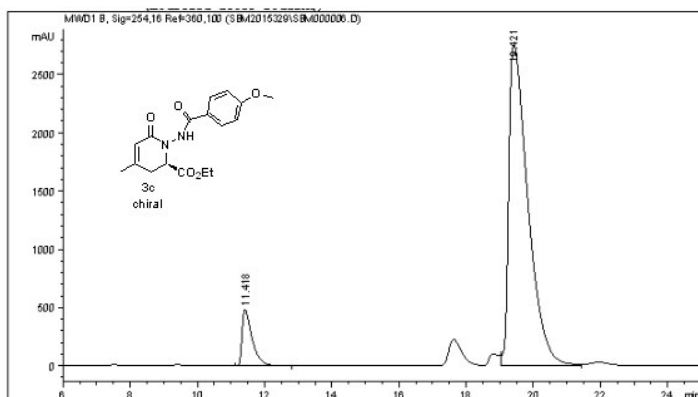

=====  
Area Percent Report  
=====

Sorted By : Signal  
Multiplier : 1.0000  
Dilution : 1.0000  
Use Multiplier & Dilution Factor with ISTDs

Signal 1: MWD1 B, Sig=254,16 Ref=360,100

| Peak # | RetTime [min] | Type | Width [min] | Area [mAU*s] | Height [mAU] | Area %  |
|--------|---------------|------|-------------|--------------|--------------|---------|
| 1      | 11.418        | BB   | 0.3022      | 9992.89453   | 485.44186    | 8.3847  |
| 2      | 19.421        | VV   | 0.5950      | 1.09187e5    | 2751.23291   | 91.6153 |

Totals : 1.19180e5 3236.67477



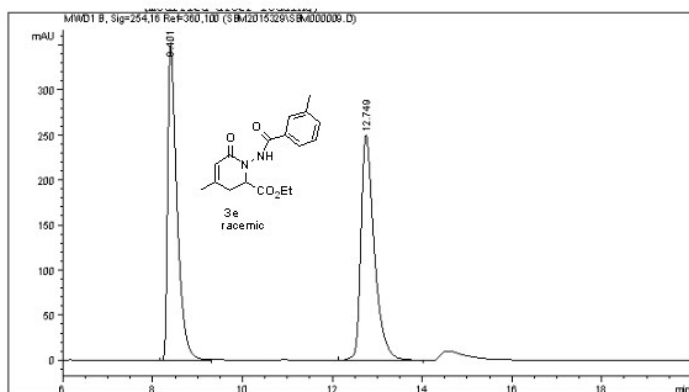

Area Percent Report

Sorted By : Signal  
Multiplier : 1.0000  
Dilution : 1.0000  
Use Multiplier & Dilution Factor with ISTDs

Signal 1: MWD1 B, Sig=254,16 Ref=360,100

| Peak # | RetTime [min] | Type | Width [min] | Area [mAU*s] | Height [mAU] | Area %  |
|--------|---------------|------|-------------|--------------|--------------|---------|
| 1      | 8.401         | EV   | 0.2153      | 5076.07373   | 349.79114    | 49.5338 |
| 2      | 12.749        | EB   | 0.3092      | 5171.61768   | 250.12096    | 50.4662 |

Totals : 1.02477e4 599.91209

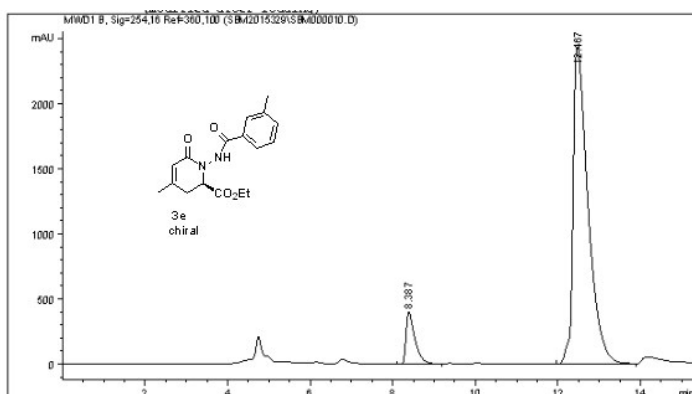

Area Percent Report

Sorted By : Signal  
Multiplier : 1.0000  
Dilution : 1.0000  
Use Multiplier & Dilution Factor with ISTDs

Signal 1: MWD1 B, Sig=254,16 Ref=360,100

| Peak # | RetTime [min] | Type | Width [min] | Area [mAU*s] | Height [mAU] | Area %  |
|--------|---------------|------|-------------|--------------|--------------|---------|
| 1      | 8.387         | VV   | 0.2168      | 5926.20459   | 399.99872    | 8.8450  |
| 2      | 12.467        | VV   | 0.3747      | 6.10741e4    | 2434.66382   | 91.1550 |

Totals : 6.70003e4 2834.66254

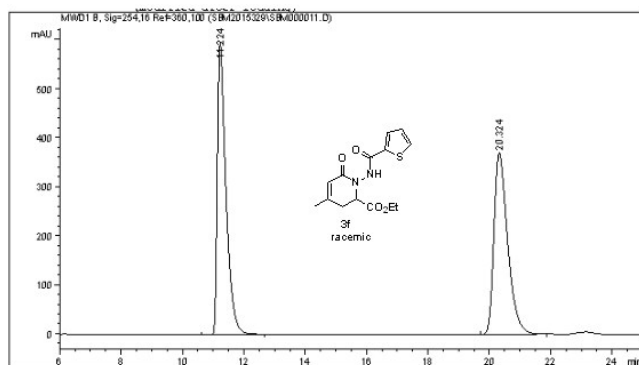

=====  
 Area Percent Report  
 =====

Sorted By : Signal  
 Multiplier : 1.0000  
 Dilution : 1.0000  
 Use Multiplier & Dilution Factor with ISTDs

Signal 1: MWD1 B, Sig=254,16 Ref=360,100

| Peak # | RetTime [min] | Type | Width [min] | Area [mAU*s] | Height [mAU] | Area %  |
|--------|---------------|------|-------------|--------------|--------------|---------|
| 1      | 11.224        | BB   | 0.2891      | 1.15909e4    | 595.49945    | 50.2445 |
| 2      | 20.324        | BB   | 0.4697      | 1.14781e4    | 370.18542    | 49.7555 |

Totals : 2.30690e4 965.68488

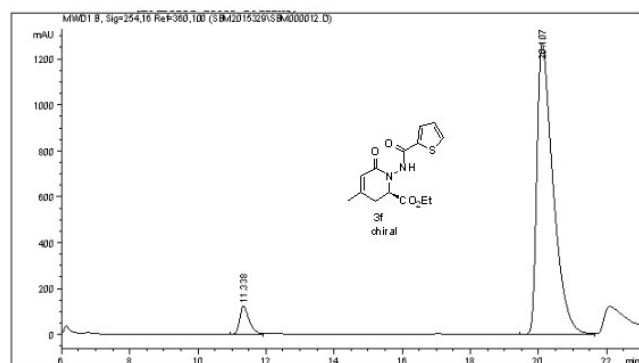

=====  
 Area Percent Report  
 =====

Sorted By : Signal  
 Multiplier : 1.0000  
 Dilution : 1.0000  
 Use Multiplier & Dilution Factor with ISTDs

Signal 1: MWD1 B, Sig=254,16 Ref=360,100

| Peak # | RetTime [min] | Type | Width [min] | Area [mAU*s] | Height [mAU] | Area %  |
|--------|---------------|------|-------------|--------------|--------------|---------|
| 1      | 11.338        | BV   | 0.2873      | 2387.16040   | 123.59637    | 5.3969  |
| 2      | 20.107        | VV   | 0.4911      | 4.18446e4    | 1267.66016   | 94.6031 |

Totals : 4.42317e4 1391.25653

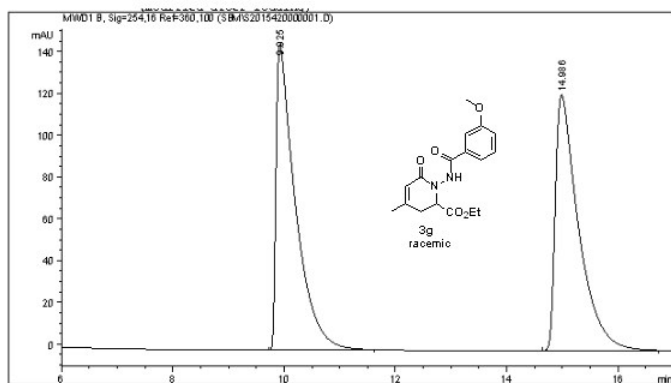

=====  
Area Percent Report  
=====

Sorted By : Signal  
Multiplier : 1.0000  
Dilution : 1.0000  
Use Multiplier & Dilution Factor with ISTDs

Signal 1: MWD1 B, Sig=254,16 Ref=360,100

| Peak #   | RetTime [min] | Tvov | Width [min] | Area [mAU*s] | Height [mAU] | Area %  |
|----------|---------------|------|-------------|--------------|--------------|---------|
| 1        | 9.925         | BB   | 0.3344      | 3516.92993   | 146.30910    | 49.8011 |
| 2        | 14.986        | BB   | 0.4196      | 3545.02539   | 122.50875    | 50.1989 |
| Totals : |               |      |             | 7061.95532   | 268.81785    |         |

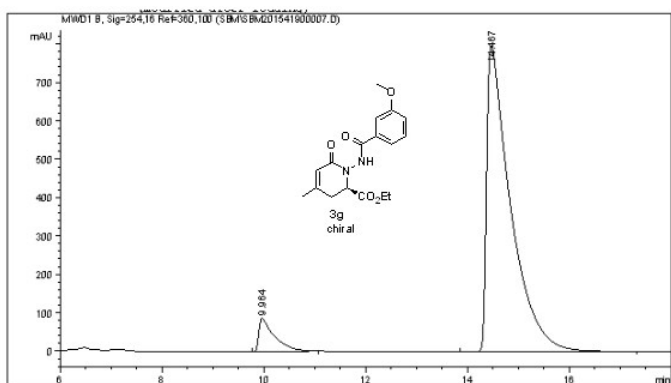

=====  
Area Percent Report  
=====

Sorted By : Signal  
Multiplier : 1.0000  
Dilution : 1.0000  
Use Multiplier & Dilution Factor with ISTDs

Signal 1: MWD1 B, Sig=254,16 Ref=360,100

| Peak #   | RetTime [min] | Tvov | Width [min] | Area [mAU*s] | Height [mAU] | Area %  |
|----------|---------------|------|-------------|--------------|--------------|---------|
| 1        | 9.964         | BB   | 0.2838      | 1810.79346   | 86.66051     | 6.5343  |
| 2        | 14.467        | BB   | 0.4525      | 2.59013e4    | 798.31549    | 93.4657 |
| Totals : |               |      |             | 2.77121e4    | 884.97601    |         |



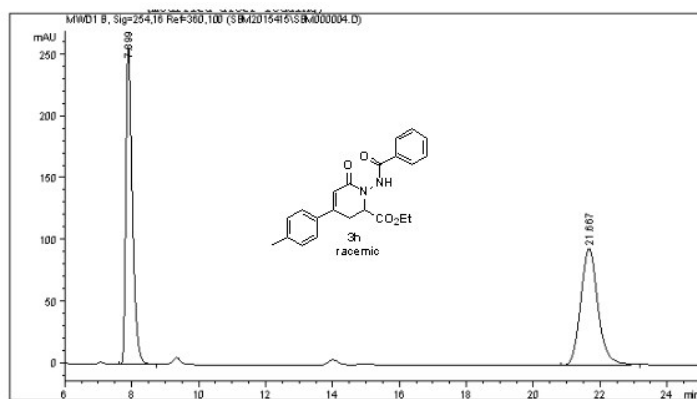

=====  
 Area Percent Report  
 =====

Sorted By : Signal  
 Multiplier : 1.0000  
 Dilution : 1.0000  
 Use Multiplier & Dilution Factor with ISTDs

Signal 1: MWD1 B, Sig=254,16 Ref=360,100

| Peak # | RetTime [min] | Type | Width [min] | Area [mAU*s] | Height [mAU] | Area %  |
|--------|---------------|------|-------------|--------------|--------------|---------|
| 1      | 7.899         | EB   | 0.2031      | 3462.56030   | 257.13708    | 50.6799 |
| 2      | 21.667        | EB   | 0.5494      | 3369.65088   | 94.19396     | 49.3201 |

Totals : 6832.21118 351.33105

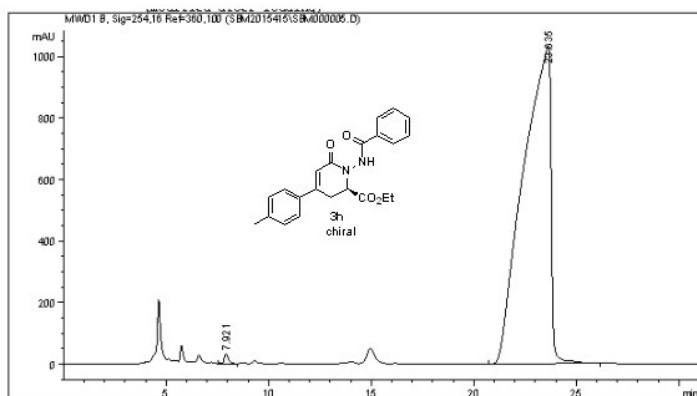

=====  
 Area Percent Report  
 =====

Sorted By : Signal  
 Multiplier : 1.0000  
 Dilution : 1.0000  
 Use Multiplier & Dilution Factor with ISTDs

Signal 1: MWD1 B, Sig=254,16 Ref=360,100

| Peak # | RetTime [min] | Type | Width [min] | Area [mAU*s] | Height [mAU] | Area %  |
|--------|---------------|------|-------------|--------------|--------------|---------|
| 1      | 7.921         | VV   | 0.2263      | 511.80624    | 33.12492     | 0.5273  |
| 2      | 23.635        | EB   | 1.1879      | 9.65518e4    | 1031.59058   | 99.4727 |

Totals : 9.70636e4 1064.71550

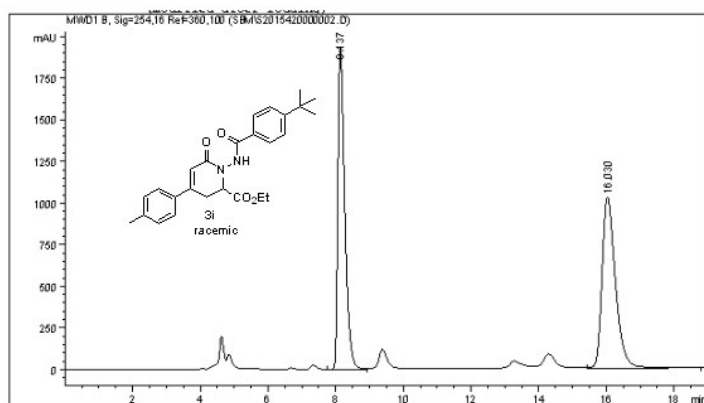

=====  
Area Percent Report  
=====

Sorted By : Signal  
Multiplier : 1.0000  
Dilution : 1.0000  
Use Multiplier & Dilution Factor with ISTDs

Signal 1: MWD1 B, Sig=254,16 Ref=360,100

| Peak # | RetTime [min] | Type | Width [min] | Area [mAU*s] | Height [mAU] | Area %  |
|--------|---------------|------|-------------|--------------|--------------|---------|
| 1      | 8.137         | VV   | 0.2138      | 2.74540e4    | 1931.45520   | 49.2902 |
| 2      | 16.030        | BB   | 0.4190      | 2.82446e4    | 1026.68567   | 50.7098 |

Totals : 5.56986e4 2958.14087

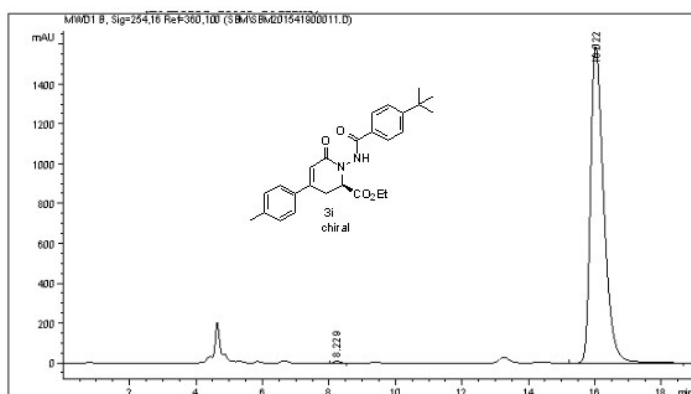

=====  
Area Percent Report  
=====

Sorted By : Signal  
Multiplier : 1.0000  
Dilution : 1.0000  
Use Multiplier & Dilution Factor with ISTDs

Signal 1: MWD1 B, Sig=254,16 Ref=360,100

| Peak # | RetTime [min] | Type | Width [min] | Area [mAU*s] | Height [mAU] | Area %  |
|--------|---------------|------|-------------|--------------|--------------|---------|
| 1      | 8.229         | VV   | 0.1772      | 177.72806    | 12.55518     | 0.4014  |
| 2      | 16.022        | BB   | 0.4239      | 4.41022e4    | 1588.54382   | 99.5986 |

Totals : 4.42799e4 1601.09900

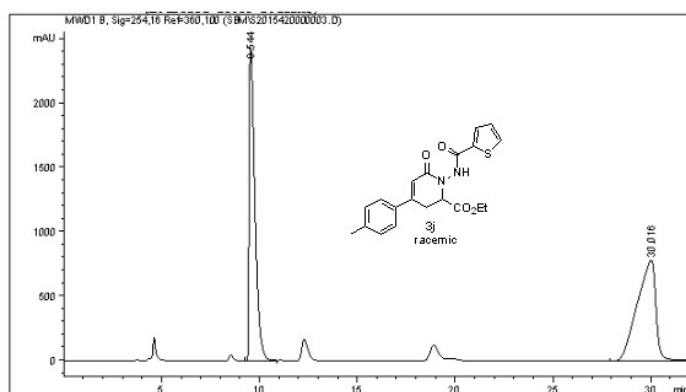

# Area Percent Report

Sorted By : Signal  
Multiplier : 1.0000  
Dilution : 1.0000  
Use Multiplier & Dilution Factor with ISTDs

Signal 1: MWD1 B, Sig=254,16 Ref=360,100

| Peak # | RetTime [min] | Type | Width [min] | Area [mAU*s] | Height [mAU] | Area %  |
|--------|---------------|------|-------------|--------------|--------------|---------|
| 1      | 9.544         | EV   | 0.3067      | 4.98935e4    | 2438.53003   | 49.0525 |
| 2      | 30.016        | BBA  | 1.1053      | 5.18211e4    | 781.79852    | 50.9475 |

Totals : 1.01715e5 3220.32855

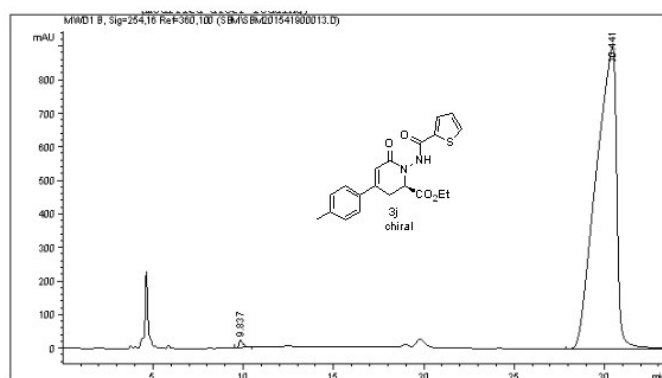

# Area Percent Report

Sorted By : Signal  
Multiplier : 1.0000  
Dilution : 1.0000  
Use Multiplier & Dilution Factor with ISTDs

Signal 1: MWD1 B, Sig=254,16 Ref=360,100

| Peak # | RetTime [min] | Type | Width [min] | Area [mAU*s] | Height [mAU] | Area %  |
|--------|---------------|------|-------------|--------------|--------------|---------|
| 1      | 9.837         | VB   | 0.2203      | 338.24966    | 22.12740     | 0.4692  |
| 2      | 30.441        | VBA  | 1.1761      | 7.17487e4    | 901.93622    | 99.5308 |

Totals : 7.20870e4 924.06362

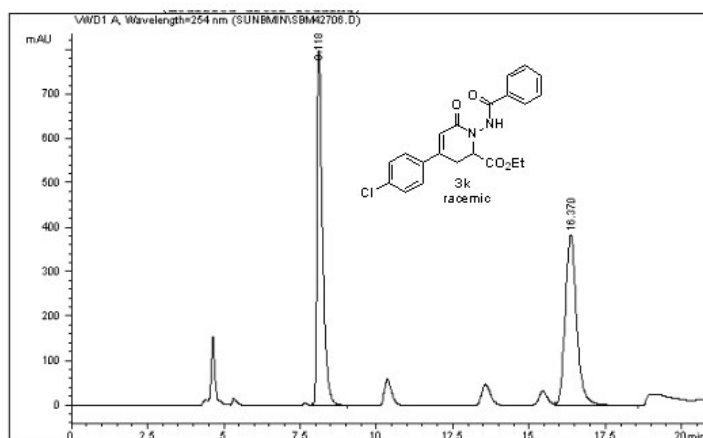

=====  
Area Percent Report  
=====

Sorted By : Signal  
Multiplier : 1.0000  
Dilution : 1.0000  
Use Multiplier & Dilution Factor with ISTDs

Signal 1: VWD1 A, Wavelength=254 nm

| Peak # | RetTime [min] | Type | Width [min] | Area mAU *s | Height [mAU] | Area %  |
|--------|---------------|------|-------------|-------------|--------------|---------|
| 1      | 8.118         | VV   | 0.1899      | 1.02136e4   | 798.77344    | 50.1519 |
| 2      | 16.370        | VB   | 0.4046      | 1.01517e4   | 383.89285    | 49.8481 |

Totals : 2.03653e4 1182.66629

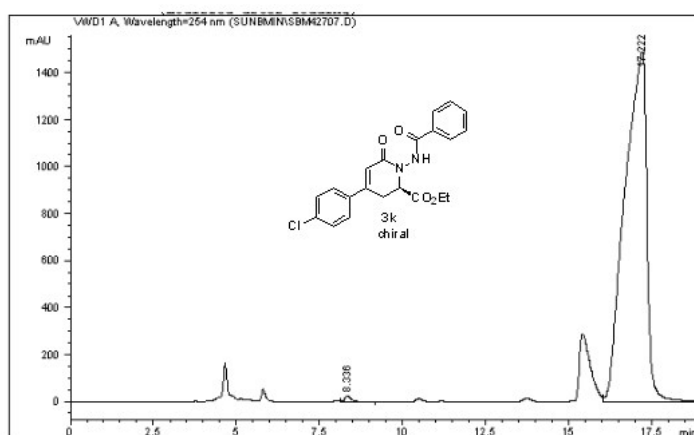

=====  
Area Percent Report  
=====

Sorted By : Signal  
Multiplier : 1.0000  
Dilution : 1.0000  
Use Multiplier & Dilution Factor with ISTDs

Signal 1: VWD1 A, Wavelength=254 nm

| Peak # | RetTime [min] | Type | Width [min] | Area mAU *s | Height [mAU] | Area %  |
|--------|---------------|------|-------------|-------------|--------------|---------|
| 1      | 8.336         | VB   | 0.2303      | 405.57346   | 25.96082     | 0.5866  |
| 2      | 17.222        | VBA  | 0.8150      | 6.87324e4   | 1489.37012   | 99.4134 |

Totals : 6.91380e4 1515.33093

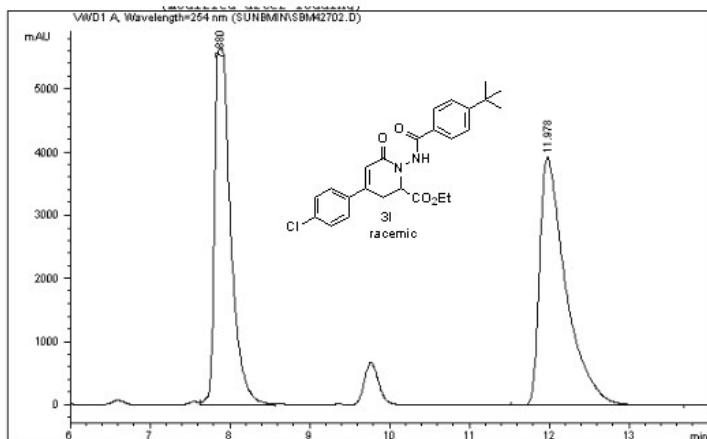

=====  
Area Percent Report  
=====

Sorted By : Signal  
Multiplier : 1.0000  
Dilution : 1.0000  
Use Multiplier & Dilution Factor with ISTDs

Signal 1: VWD1 A, Wavelength=254 nm

| Peak # | RetTime [min] | Type | Width [min] | Area mAU  | %s | Height [mAU] | Area %  |
|--------|---------------|------|-------------|-----------|----|--------------|---------|
| 1      | 7.880         | VV   | 0.2080      | 7.95160e4 |    | 5651.54004   | 47.0605 |
| 2      | 11.978        | VV   | 0.3335      | 8.95619e4 |    | 3919.90039   | 52.9395 |

Totals : 1.69178e5 9571.44043

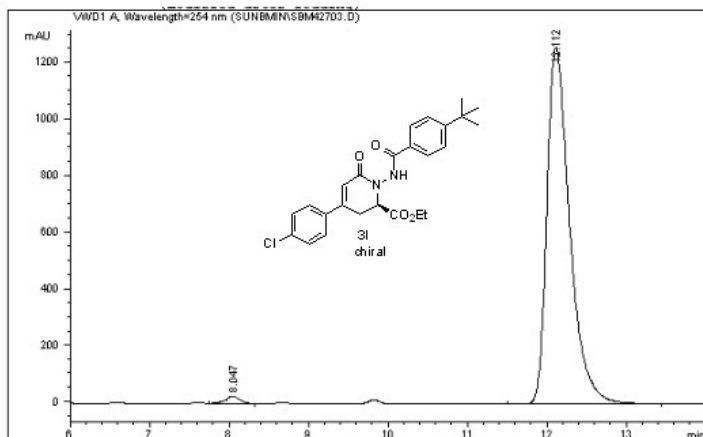

=====  
Area Percent Report  
=====

Sorted By : Signal  
Multiplier : 1.0000  
Dilution : 1.0000  
Use Multiplier & Dilution Factor with ISTDs

Signal 1: VWD1 A, Wavelength=254 nm

| Peak # | RetTime [min] | Type | Width [min] | Area mAU  | %s | Height [mAU] | Area %  |
|--------|---------------|------|-------------|-----------|----|--------------|---------|
| 1      | 8.047         | VV   | 0.2126      | 395.16156 |    | 27.06244     | 1.5484  |
| 2      | 12.112        | PB   | 0.3022      | 2.51261e4 |    | 1261.84644   | 98.4516 |

Totals : 2.55212e4 1288.90887

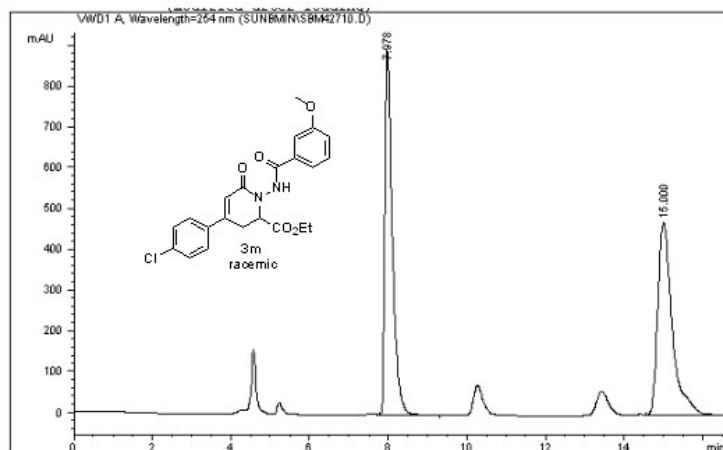

=====  
Area Percent Report  
=====

Sorted By : Signal  
Multiplier : 1.0000  
Dilution : 1.0000  
Use Multiplier & Dilution Factor with ISTDs

Signal 1: VWD1 A, Wavelength=254 nm

| Peak # | RetTime [min] | Type | Width [min] | Area mAU  | Area %  | Height [mAU] | Area %  |
|--------|---------------|------|-------------|-----------|---------|--------------|---------|
| 1      | 7.978         | VB   | 0.1944      | 1.17706e4 | 49.0292 | 894.05591    | 49.0292 |
| 2      | 15.000        | VBA  | 0.3870      | 1.22368e4 | 50.9708 | 474.09323    | 50.9708 |

Totals : 2.40074e4 1368.14914

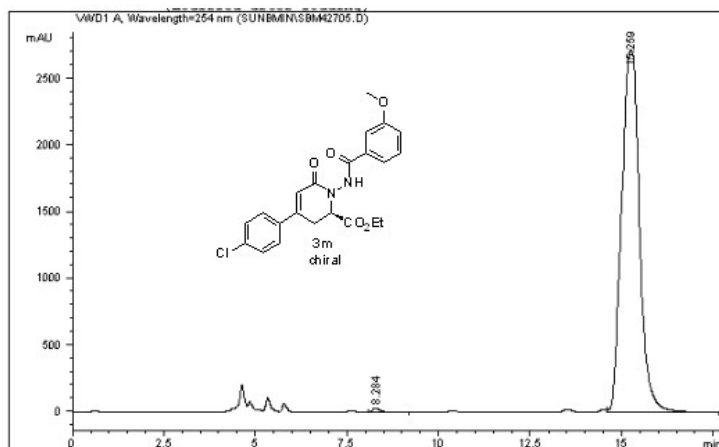

=====  
Area Percent Report  
=====

Sorted By : Signal  
Multiplier : 1.0000  
Dilution : 1.0000  
Use Multiplier & Dilution Factor with ISTDs

Signal 1: VWD1 A, Wavelength=254 nm

| Peak # | RetTime [min] | Type | Width [min] | Area mAU  | Area %  | Height [mAU] | Area %  |
|--------|---------------|------|-------------|-----------|---------|--------------|---------|
| 1      | 8.284         | VP   | 0.2694      | 523.50281 | 0.5632  | 28.92497     | 0.5632  |
| 2      | 15.259        | VB   | 0.5026      | 9.24262e4 | 99.4368 | 2720.81470   | 99.4368 |

Totals : 9.29497e4 2749.73967

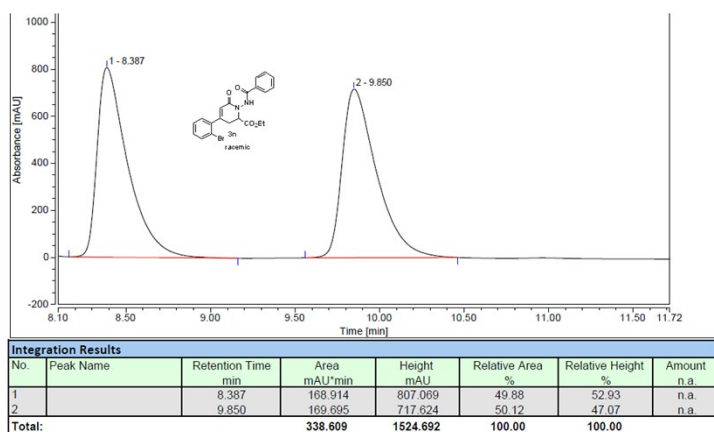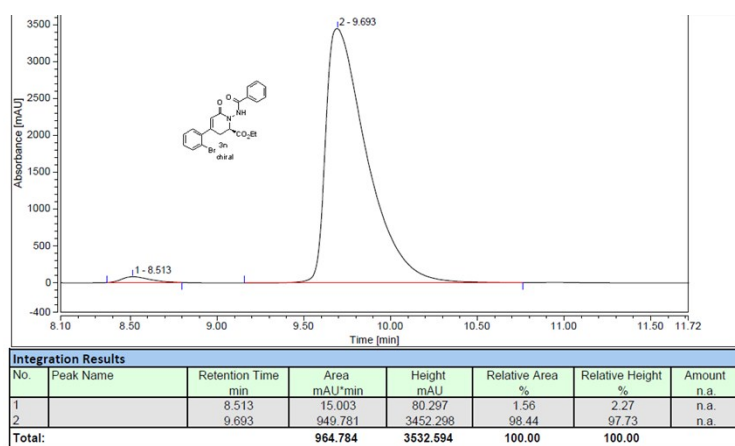

## 6. Determination of the absolute configuration by comparison

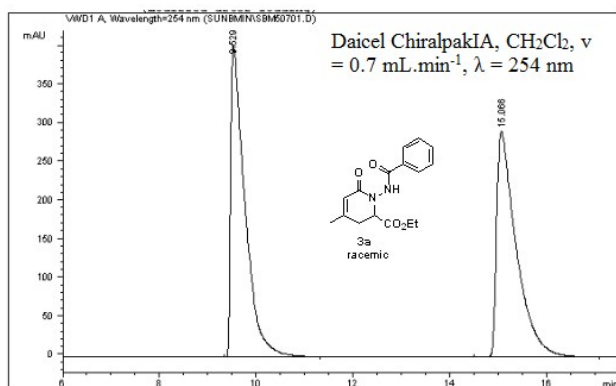

### Area Percent Report

Sorted By : Signal  
Multiplier : 1.0000  
Dilution : 1.0000  
Use Multiplier & Dilution Factor with ISTDs

Signal 1: VWD1 A, Wavelength=254 nm

| Peak # | RetTime [min] | Type | Width [min] | Area [mAU] | %s | Height [mAU] | Area %  |
|--------|---------------|------|-------------|------------|----|--------------|---------|
| 1      | 9.529         | PB   | 0.2915      | 8253.67090 |    | 402.76825    | 49.9614 |
| 2      | 15.066        | BB   | 0.4065      | 8266.42969 |    | 291.56198    | 50.0386 |

Totals : 1.65201e4 694.33023

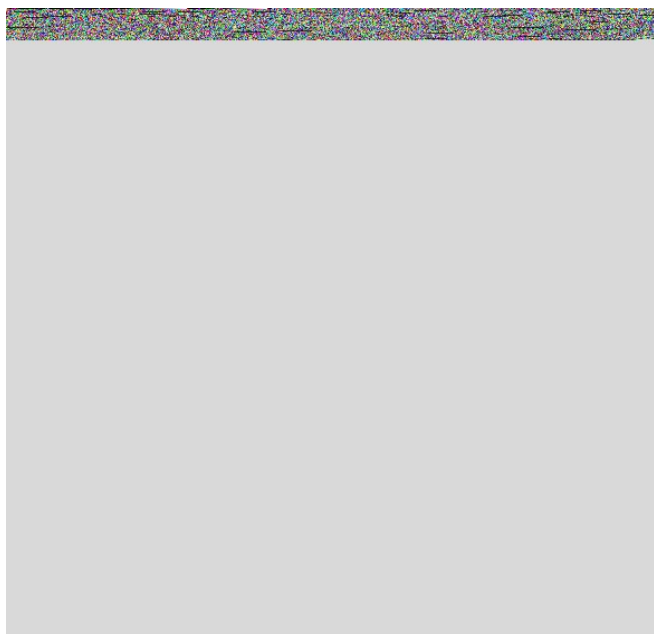



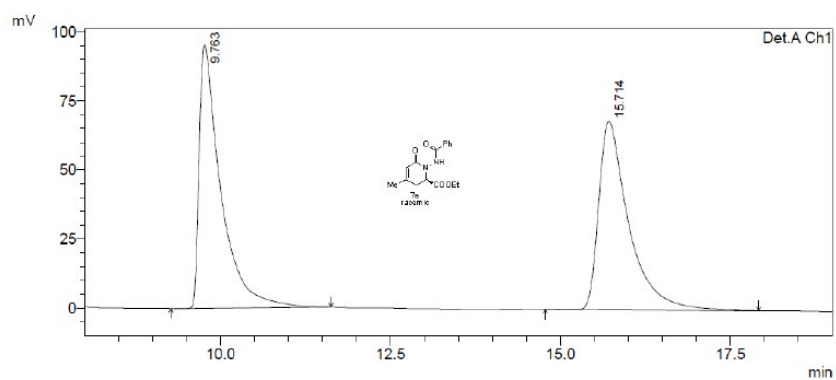

| Peak# | Ret. Time | Area    | Height | Area %  | Height % |
|-------|-----------|---------|--------|---------|----------|
| 1     | 9.763     | 2095405 | 95317  | 49.957  | 58.274   |
| 2     | 15.714    | 2099036 | 68250  | 50.043  | 41.726   |
| Total |           | 4194441 | 163567 | 100.000 | 100.000  |

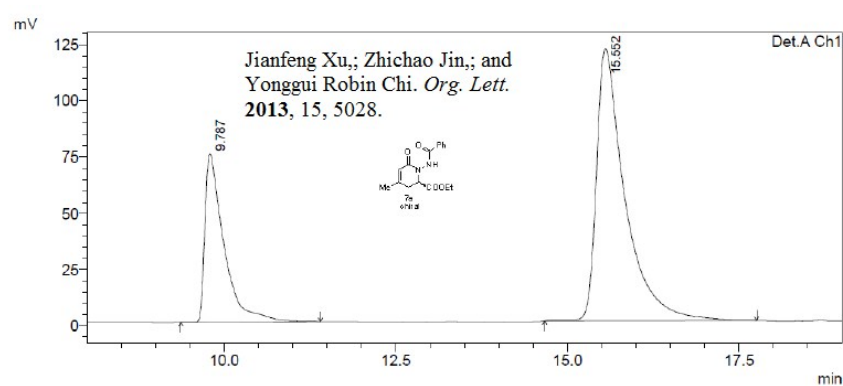

| Peak# | Ret. Time | Area    | Height | Area %  | Height % |
|-------|-----------|---------|--------|---------|----------|
| 1     | 9.787     | 1452698 | 74906  | 29.289  | 38.187   |
| 2     | 15.552    | 3507144 | 121252 | 70.711  | 61.813   |
| Total |           | 4959841 | 196158 | 100.000 | 100.000  |
